# Supplementary material for: Comprehensive pan-cancer analysis of p62 reveals its contribution to shaping tumor microenvironment and anti-tumor immunity
Source: Discov Oncol. 2025 Nov 25;16:2296. doi: 10.1007/s12672-025-04135-1 (PMC12748421; doi:10.1007/s12672-025-04135-1)
Supplement: Supplementary file 8 — Additional file8 (XLSX 11 KB) [file 12672_2025_4135_MOESM8_ESM.xlsx]

## Sheet: Sheet1
Cancer.Type	Num.of.patients	name
ACC	77	Adrenocortical carcinoma
BLCA	397	Bladder Urothelial Carcinoma
BRCA	933	Breast invasive carcinoma
CESC	256	Cervical squamous cell carcinoma and endocervical adenocarcinoma
CHOL	35	Cholangio carcinoma
COAD	365	Colon adenocarcinoma
DLBC	35	Lymphoid Neoplasm Diffuse Large B-cell Lymphoma
ESCA	150	Esophageal carcinoma
GBM	133	Glioblastoma multiforme
HNSC	481	Head and Neck squamous cell carcinoma
KICH	64	Kidney Chromophobe
KIRC	323	Kidney renal clear cell carcinoma
KIRP	273	Kidney renal papillary cell carcinoma
LGG	483	Brain Lower Grade Glioma
LIHC	347	Liver hepatocellular carcinoma
LUAD	486	Lung adenocarcinoma
LUSC	473	Lung squamous cell carcinoma
MESO	72	Mesothelioma
OV	257	Ovarian serous cystadenocarcinoma
PAAD	141	Pancreatic adenocarcinoma
PCPG	157	Pheochromocytoma and Paraganglioma
PRAD	456	Prostate adenocarcinoma
READ	120
SARC	229	Sarcoma
SKCM	98	Skin Cutaneous Melanoma
STAD	338	Stomach adenocarcinoma
TGCT	126	Testicular Germ Cell Tumors
THCA	470	Thyroid carcinoma
THYM	102	Thymoma
UCEC	510	Uterine Corpus Endometrial Carcinoma
UCS	53	Uterine Carcinosarcoma
UVM	77	Uveal Melanoma
