# Supplementary material for: Comprehensive pan-cancer analysis of p62 reveals its contribution to shaping tumor microenvironment and anti-tumor immunity
Source: Discov Oncol. 2025 Nov 25;16:2296. doi: 10.1007/s12672-025-04135-1 (PMC12748421; doi:10.1007/s12672-025-04135-1)
Supplement: Supplementary file 9 — Additional file9 (XLSX 87 KB) [file 12672_2025_4135_MOESM9_ESM.xlsx]

## Sheet: correlation results
Parameter1	Parameter2	rho	CI	CI_low	CI_high	S	p	Method	n_Obs	cancer
SQSTM1	ALLOGRAFT REJECTION	0.322388	0.95	0.0994037	0.514541	51550	0.0113436	Spearman correlation	77	ACC
SQSTM1	APICAL SURFACE	-0.364714	0.95	-0.548959	-0.14667	103822	0.00358211	Spearman correlation	77	ACC
SQSTM1	COMPLEMENT	0.29113	0.95	0.0651312	0.48872	53928	0.0233201	Spearman correlation	77	ACC
SQSTM1	DNA REPAIR	-0.331064	0.95	-0.521647	-0.109011	101262	0.00908846	Spearman correlation	77	ACC
SQSTM1	E2F TARGETS	-0.423944	0.95	-0.596095	-0.214529	108328	0.000561427	Spearman correlation	77	ACC
SQSTM1	FATTY ACID METABOLISM	0.269546	0.95	0.0417733	0.470686	55570	0.0377354	Spearman correlation	77	ACC
SQSTM1	G2M CHECKPOINT	-0.459803	0.95	-0.624067	-0.256618	111056	0.000137539	Spearman correlation	77	ACC
SQSTM1	HEDGEHOG SIGNALING	-0.330012	0.95	-0.520787	-0.107844	101182	0.00930222	Spearman correlation	77	ACC
SQSTM1	IL6 JAK STAT3 SIGNALING	0.26881	0.95	0.040981	0.470068	55626	0.0382361	Spearman correlation	77	ACC
SQSTM1	INTERFERON GAMMA RESPONSE	0.356985	0.95	0.137964	0.54272	48918	0.00443796	Spearman correlation	77	ACC
SQSTM1	KRAS SIGNALING DN	-0.339634	0.95	-0.52864	-0.118542	101914	0.00726233	Spearman correlation	77	ACC
SQSTM1	MITOTIC SPINDLE	-0.325254	0.95	-0.516891	-0.102572	100820	0.0105509	Spearman correlation	77	ACC
SQSTM1	MYC TARGETS V1	-0.411483	0.95	-0.586276	-0.200083	107380	0.000851214	Spearman correlation	77	ACC
SQSTM1	MYC TARGETS V2	-0.442873	0.95	-0.610913	-0.23665	109768	0.000269691	Spearman correlation	77	ACC
SQSTM1	MYOGENESIS	-0.265787	0.95	-0.467528	-0.0377301	96296	0.0404405	Spearman correlation	77	ACC
SQSTM1	OXIDATIVE PHOSPHORYLATION	0.378437	0.95	0.162212	0.559985	47286	0.0023834	Spearman correlation	77	ACC
SQSTM1	P53 PATHWAY	0.351806	0.95	0.132149	0.538528	49312	0.00515967	Spearman correlation	77	ACC
SQSTM1	PANCREAS BETA CELLS	-0.447079	0.95	-0.614189	-0.241595	110088	0.000228883	Spearman correlation	77	ACC
SQSTM1	PROTEIN SECRETION	0.271439	0.95	0.0438118	0.472274	55426	0.0363078	Spearman correlation	77	ACC
SQSTM1	REACTIVE OXYGEN SPECIES PATHWAY	0.418871	0.95	0.208636	0.592103	44210	0.00067025	Spearman correlation	77	ACC
SQSTM1	SPERMATOGENESIS	-0.340423	0.95	-0.529282	-0.119421	101974	0.00710128	Spearman correlation	77	ACC
SQSTM1	TGF BETA SIGNALING	-0.276013	0.95	-0.476107	-0.0487461	97074	0.0326473	Spearman correlation	77	ACC
SQSTM1	UNFOLDED PROTEIN RESPONSE	-0.336611	0.95	-0.526176	-0.115175	101684	0.00785408	Spearman correlation	77	ACC
SQSTM1	WNT BETA CATENIN SIGNALING	-0.443399	0.95	-0.611322	-0.237267	109808	0.000265654	Spearman correlation	77	ACC
SQSTM1	ANGIOGENESIS	-0.145702	0.95	-0.242346	-0.046194	1.2779e+07	0.00461784	Spearman correlation	406	BLCA
SQSTM1	APICAL JUNCTION	-0.210668	0.95	-0.304425	-0.112868	1.35036e+07	3.21e-05	Spearman correlation	406	BLCA
SQSTM1	APICAL SURFACE	-0.175251	0.95	-0.270681	-0.076411	1.31086e+07	0.000590986	Spearman correlation	406	BLCA
SQSTM1	BILE ACID METABOLISM	-0.141101	0.95	-0.23792	-0.0415061	1.27277e+07	0.00612539	Spearman correlation	406	BLCA
SQSTM1	COAGULATION	-0.117057	0.95	-0.214721	-0.0170751	1.24595e+07	0.023932	Spearman correlation	406	BLCA
SQSTM1	EPITHELIAL MESENCHYMAL TRANSITION	-0.196616	0.95	-0.291065	-0.0983719	1.33469e+07	0.000108555	Spearman correlation	406	BLCA
SQSTM1	HEDGEHOG SIGNALING	-0.140993	0.95	-0.237816	-0.0413963	1.27265e+07	0.00616066	Spearman correlation	406	BLCA
SQSTM1	HEME METABOLISM	-0.126193	0.95	-0.223549	-0.0263443	1.25614e+07	0.0145715	Spearman correlation	406	BLCA
SQSTM1	INTERFERON ALPHA RESPONSE	0.131622	0.95	0.0318602	0.228787	9.68575e+06	0.0107301	Spearman correlation	406	BLCA
SQSTM1	KRAS SIGNALING DN	-0.342088	0.95	-0.427615	-0.250491	1.49694e+07	3.72e-12	Spearman correlation	406	BLCA
SQSTM1	MTORC1 SIGNALING	0.255991	0.95	0.15991	0.347267	8.29855e+06	3.38e-07	Spearman correlation	406	BLCA
SQSTM1	MYC TARGETS V1	0.162784	0.95	0.0636396	0.258746	9.33817e+06	0.00146697	Spearman correlation	406	BLCA
SQSTM1	MYC TARGETS V2	0.227806	0.95	0.130605	0.32067	8.61292e+06	6.39e-06	Spearman correlation	406	BLCA
SQSTM1	MYOGENESIS	-0.324096	0.95	-0.410936	-0.231428	1.47687e+07	5.52e-11	Spearman correlation	406	BLCA
SQSTM1	OXIDATIVE PHOSPHORYLATION	0.252946	0.95	0.156736	0.3444	8.33252e+06	4.73e-07	Spearman correlation	406	BLCA
SQSTM1	P53 PATHWAY	0.173738	0.95	0.0748588	0.269234	9.21599e+06	0.000662421	Spearman correlation	406	BLCA
SQSTM1	PANCREAS BETA CELLS	-0.258963	0.95	-0.350063	-0.16301	1.40423e+07	2.43e-07	Spearman correlation	406	BLCA
SQSTM1	REACTIVE OXYGEN SPECIES PATHWAY	0.286941	0.95	0.192287	0.376306	7.95334e+06	8.54e-09	Spearman correlation	406	BLCA
SQSTM1	SPERMATOGENESIS	-0.334166	0.95	-0.420278	-0.242089	14881068	1.24e-11	Spearman correlation	406	BLCA
SQSTM1	TGF BETA SIGNALING	-0.17172	0.95	-0.267304	-0.0727907	1.30692e+07	0.000771926	Spearman correlation	406	BLCA
SQSTM1	TNFA SIGNALING VIA NFKB	0.107486	0.95	0.00738385	0.205456	9.95495e+06	0.0387453	Spearman correlation	406	BLCA
SQSTM1	UNFOLDED PROTEIN RESPONSE	0.18842	0.95	0.089936	0.283255	9.05223e+06	0.000212653	Spearman correlation	406	BLCA
SQSTM1	UV RESPONSE DN	-0.140108	0.95	-0.236964	-0.0404947	1.27166e+07	0.00647702	Spearman correlation	406	BLCA
SQSTM1	ALLOGRAFT REJECTION	-0.192867	0.95	-0.25519	-0.128949	1.69381e+08	3.35e-09	Spearman correlation	948	BRCA
SQSTM1	ANDROGEN RESPONSE	-0.179862	0.95	-0.242551	-0.115678	1.67535e+08	3.74e-08	Spearman correlation	948	BRCA
SQSTM1	ANGIOGENESIS	-0.277232	0.95	-0.336663	-0.215602	1.81361e+08	7.2e-18	Spearman correlation	948	BRCA
SQSTM1	APICAL JUNCTION	-0.323878	0.95	-0.381331	-0.263933	1.87984e+08	3.45e-24	Spearman correlation	948	BRCA
SQSTM1	APICAL SURFACE	-0.339426	0.95	-0.39616	-0.28011	1.90192e+08	1.46e-26	Spearman correlation	948	BRCA
SQSTM1	APOPTOSIS	-0.195619	0.95	-0.257861	-0.13176	169772020	1.99e-09	Spearman correlation	948	BRCA
SQSTM1	CHOLESTEROL HOMEOSTASIS	0.145775	0.95	0.0810007	0.209323	1.21296e+08	9.21e-06	Spearman correlation	948	BRCA
SQSTM1	COAGULATION	-0.168174	0.95	-0.231174	-0.103769	1.65875e+08	2.81e-07	Spearman correlation	948	BRCA
SQSTM1	COMPLEMENT	-0.16137	0.95	-0.224543	-0.0968461	1.64909e+08	8.56e-07	Spearman correlation	948	BRCA
SQSTM1	DNA REPAIR	0.343397	0.95	0.284247	0.399943	9.32344e+07	3.47e-27	Spearman correlation	948	BRCA
SQSTM1	E2F TARGETS	0.113798	0.95	0.0486126	0.178019	1.25836e+08	0.00057466	Spearman correlation	948	BRCA
SQSTM1	EPITHELIAL MESENCHYMAL TRANSITION	-0.251799	0.95	-0.312195	-0.189377	1.77749e+08	6.77e-15	Spearman correlation	948	BRCA
SQSTM1	G2M CHECKPOINT	0.07422	0.95	0.00871399	0.139092	1.31456e+08	0.0258865	Spearman correlation	948	BRCA
SQSTM1	GLYCOLYSIS	0.146741	0.95	0.0819817	0.210267	1.21159e+08	8e-06	Spearman correlation	948	BRCA
SQSTM1	HEDGEHOG SIGNALING	-0.308281	0.95	-0.366425	-0.247739	1.85769e+08	6.08e-22	Spearman correlation	948	BRCA
SQSTM1	HEME METABOLISM	-0.117179	0.95	-0.181335	-0.0520306	1.58634e+08	0.000387861	Spearman correlation	948	BRCA
SQSTM1	HYPOXIA	-0.259481	0.95	-0.319593	-0.197288	1.7884e+08	9.27e-16	Spearman correlation	948	BRCA
SQSTM1	IL2 STAT5 SIGNALING	-0.27738	0.95	-0.336805	-0.215754	1.81382e+08	6.92e-18	Spearman correlation	948	BRCA
SQSTM1	IL6 JAK STAT3 SIGNALING	-0.203309	0.95	-0.265322	-0.139621	170863972	4.33e-10	Spearman correlation	948	BRCA
SQSTM1	INFLAMMATORY RESPONSE	-0.244753	0.95	-0.305402	-0.182127	1.76749e+08	3.98e-14	Spearman correlation	948	BRCA
SQSTM1	INTERFERON GAMMA RESPONSE	-0.0697698	0.95	-0.134702	-0.00424078	1.51902e+08	0.0364967	Spearman correlation	948	BRCA
SQSTM1	KRAS SIGNALING DN	-0.393838	0.95	-0.447826	-0.336989	1.97918e+08	5.06e-36	Spearman correlation	948	BRCA
SQSTM1	KRAS SIGNALING UP	-0.346589	0.95	-0.402982	-0.287573	1.91209e+08	1.07e-27	Spearman correlation	948	BRCA
SQSTM1	MITOTIC SPINDLE	-0.105143	0.95	-0.169523	-0.0398691	1.56925e+08	0.00148503	Spearman correlation	948	BRCA
SQSTM1	MTORC1 SIGNALING	0.257573	0.95	0.195322	0.317756	1.05421e+08	1.52e-15	Spearman correlation	948	BRCA
SQSTM1	MYC TARGETS V1	0.232264	0.95	0.169293	0.293346	1.09015e+08	7.92e-13	Spearman correlation	948	BRCA
SQSTM1	MYC TARGETS V2	0.268081	0.95	0.206156	0.327868	1.03929e+08	9.18e-17	Spearman correlation	948	BRCA
SQSTM1	MYOGENESIS	-0.28128	0.95	-0.34055	-0.219784	1.81936e+08	2.27e-18	Spearman correlation	948	BRCA
SQSTM1	NOTCH SIGNALING	-0.232751	0.95	-0.293816	-0.169793	1.75045e+08	7.07e-13	Spearman correlation	948	BRCA
SQSTM1	OXIDATIVE PHOSPHORYLATION	0.405305	0.95	0.349029	0.458668	8.44438e+07	2.93e-38	Spearman correlation	948	BRCA
SQSTM1	P53 PATHWAY	-0.0902498	0.95	-0.154882	-0.0248484	1.5481e+08	0.0065789	Spearman correlation	948	BRCA
SQSTM1	PANCREAS BETA CELLS	-0.264945	0.95	-0.324852	-0.202921	1.79616e+08	2.14e-16	Spearman correlation	948	BRCA
SQSTM1	PEROXISOME	0.176972	0.95	0.112731	0.239739	1.16866e+08	6.23e-08	Spearman correlation	948	BRCA
SQSTM1	PROTEIN SECRETION	-0.103181	0.95	-0.167596	-0.0378885	156646219	0.00182442	Spearman correlation	948	BRCA
SQSTM1	REACTIVE OXYGEN SPECIES PATHWAY	0.2022	0.95	0.138487	0.264246	113283706	5.42e-10	Spearman correlation	948	BRCA
SQSTM1	SPERMATOGENESIS	-0.278442	0.95	-0.337824	-0.216851	1.81532e+08	5.1e-18	Spearman correlation	948	BRCA
SQSTM1	TGF BETA SIGNALING	-0.375574	0.95	-0.430524	-0.317851	1.95325e+08	1.22e-32	Spearman correlation	948	BRCA
SQSTM1	TNFA SIGNALING VIA NFKB	-0.240216	0.95	-0.301025	-0.177462	1.76105e+08	1.21e-13	Spearman correlation	948	BRCA
SQSTM1	UNFOLDED PROTEIN RESPONSE	0.239222	0.95	0.17644	0.300065	1.08027e+08	1.53e-13	Spearman correlation	948	BRCA
SQSTM1	UV RESPONSE DN	-0.389362	0.95	-0.443589	-0.332295	1.97283e+08	3.53e-35	Spearman correlation	948	BRCA
SQSTM1	WNT BETA CATENIN SIGNALING	-0.338874	0.95	-0.395634	-0.279535	1.90113e+08	1.78e-26	Spearman correlation	948	BRCA
SQSTM1	ANGIOGENESIS	-0.142038	0.95	-0.263504	-0.0161392	3193322	0.0357566	Spearman correlation	256	CESC
SQSTM1	APICAL JUNCTION	-0.222344	0.95	-0.339021	-0.0989315	3417870	0.000712516	Spearman correlation	256	CESC
SQSTM1	APICAL SURFACE	-0.259819	0.95	-0.373754	-0.138161	3522656	6.44e-05	Spearman correlation	256	CESC
SQSTM1	BILE ACID METABOLISM	-0.153921	0.95	-0.274773	-0.028282	3226548	0.0221446	Spearman correlation	256	CESC
SQSTM1	CHOLESTEROL HOMEOSTASIS	0.146856	0.95	0.0210575	0.268076	2385528	0.0297322	Spearman correlation	256	CESC
SQSTM1	DNA REPAIR	0.237133	0.95	0.114367	0.352766	2133098	0.000291355	Spearman correlation	256	CESC
SQSTM1	EPITHELIAL MESENCHYMAL TRANSITION	-0.272267	0.95	-0.38522	-0.151276	3557462	2.64e-05	Spearman correlation	256	CESC
SQSTM1	ESTROGEN RESPONSE LATE	-0.173255	0.95	-0.293037	-0.0481191	3280610	0.00945488	Spearman correlation	256	CESC
SQSTM1	HEDGEHOG SIGNALING	-0.228312	0.95	-0.344573	-0.105153	3434556	0.000500644	Spearman correlation	256	CESC
SQSTM1	KRAS SIGNALING DN	-0.36232	0.95	-0.46715	-0.247445	3809264	9.43e-09	Spearman correlation	256	CESC
SQSTM1	KRAS SIGNALING UP	-0.183985	0.95	-0.303136	-0.0591705	3310612	0.00568581	Spearman correlation	256	CESC
SQSTM1	MITOTIC SPINDLE	-0.156522	0.95	-0.277235	-0.0309446	3233820	0.0198204	Spearman correlation	256	CESC
SQSTM1	MTORC1 SIGNALING	0.313343	0.95	0.194859	0.422813	1920004	9.75e-07	Spearman correlation	256	CESC
SQSTM1	MYC TARGETS V1	0.196005	0.95	0.0715874	0.314417	2248098	0.0030972	Spearman correlation	256	CESC
SQSTM1	MYC TARGETS V2	0.243858	0.95	0.121405	0.358999	2114294	0.00018914	Spearman correlation	256	CESC
SQSTM1	MYOGENESIS	-0.261298	0.95	-0.375117	-0.139716	3526790	5.82e-05	Spearman correlation	256	CESC
SQSTM1	OXIDATIVE PHOSPHORYLATION	0.224091	0.95	0.100751	0.340647	2169566	0.000642908	Spearman correlation	256	CESC
SQSTM1	PANCREAS BETA CELLS	-0.156583	0.95	-0.277292	-0.0310068	3233990	0.0197905	Spearman correlation	256	CESC
SQSTM1	REACTIVE OXYGEN SPECIES PATHWAY	0.143556	0.95	0.0176882	0.264945	2394754	0.0336872	Spearman correlation	256	CESC
SQSTM1	SPERMATOGENESIS	-0.331542	0.95	-0.439349	-0.21432	3723204	1.92e-07	Spearman correlation	256	CESC
SQSTM1	TGF BETA SIGNALING	-0.196582	0.95	-0.314957	-0.0721839	3345834	0.0030201	Spearman correlation	256	CESC
SQSTM1	UNFOLDED PROTEIN RESPONSE	0.290045	0.95	0.170082	0.401537	1985148	6.7e-06	Spearman correlation	256	CESC
SQSTM1	UV RESPONSE DN	-0.276315	0.95	-0.388942	-0.15555	3568780	1.94e-05	Spearman correlation	256	CESC
SQSTM1	WNT BETA CATENIN SIGNALING	-0.135297	0.95	-0.257096	-0.00926676	3174472	0.0457907	Spearman correlation	256	CESC
SQSTM1	ANGIOGENESIS	-0.411485	0.95	-0.660734	-0.0805037	10078	0.0400002	Spearman correlation	35	CHOL
SQSTM1	APICAL SURFACE	-0.407003	0.95	-0.65769	-0.0751529	10046	0.0423471	Spearman correlation	35	CHOL
SQSTM1	INTERFERON ALPHA RESPONSE	0.412325	0.95	0.0815091	0.661304	4196	0.0395673	Spearman correlation	35	CHOL
SQSTM1	KRAS SIGNALING DN	-0.468908	0.95	-0.699023	-0.150791	10488	0.0157787	Spearman correlation	35	CHOL
SQSTM1	ALLOGRAFT REJECTION	-0.255572	0.95	-0.348449	-0.157726	1.26051e+07	4.96e-07	Spearman correlation	392	COAD
SQSTM1	ANDROGEN RESPONSE	-0.450337	0.95	-0.528048	-0.365146	1.45604e+07	1.95e-20	Spearman correlation	392	COAD
SQSTM1	ANGIOGENESIS	-0.391352	0.95	-0.47438	-0.301422	1.39682e+07	2.3e-15	Spearman correlation	392	COAD
SQSTM1	APICAL JUNCTION	-0.390971	0.95	-0.474032	-0.301014	1.39644e+07	2.46e-15	Spearman correlation	392	COAD
SQSTM1	APICAL SURFACE	-0.321845	0.95	-0.410336	-0.227348	1.32704e+07	1.42e-10	Spearman correlation	392	COAD
SQSTM1	APOPTOSIS	-0.167988	0.95	-0.265399	-0.0671823	1.17258e+07	0.00114356	Spearman correlation	392	COAD
SQSTM1	CHOLESTEROL HOMEOSTASIS	0.129358	0.95	0.0277675	0.228303	8.74065e+06	0.0129055	Spearman correlation	392	COAD
SQSTM1	COAGULATION	-0.204197	0.95	-0.299909	-0.104414	1.20893e+07	6.91e-05	Spearman correlation	392	COAD
SQSTM1	COMPLEMENT	-0.280286	0.95	-0.371622	-0.183575	1.28532e+07	3.02e-08	Spearman correlation	392	COAD
SQSTM1	DNA REPAIR	0.400674	0.95	0.31144	0.482903	6.01682e+06	4.19e-16	Spearman correlation	392	COAD
SQSTM1	E2F TARGETS	0.119549	0.95	0.0178101	0.218838	8.83912e+06	0.0218688	Spearman correlation	392	COAD
SQSTM1	EPITHELIAL MESENCHYMAL TRANSITION	-0.330957	0.95	-0.418782	-0.236997	1.33619e+07	3.89e-11	Spearman correlation	392	COAD
SQSTM1	ESTROGEN RESPONSE EARLY	-0.213425	0.95	-0.308665	-0.113948	1.2182e+07	3.11e-05	Spearman correlation	392	COAD
SQSTM1	FATTY ACID METABOLISM	0.23638	0.95	0.137743	0.330374	7.66622e+06	3.6e-06	Spearman correlation	392	COAD
SQSTM1	HEDGEHOG SIGNALING	-0.3707	0.95	-0.455442	-0.279299	1.37609e+07	8.15e-14	Spearman correlation	392	COAD
SQSTM1	HEME METABOLISM	-0.183597	0.95	-0.280306	-0.0831979	1.18825e+07	0.000363787	Spearman correlation	392	COAD
SQSTM1	HYPOXIA	-0.199959	0.95	-0.295884	-0.100043	1.20468e+07	9.81e-05	Spearman correlation	392	COAD
SQSTM1	IL2 STAT5 SIGNALING	-0.299151	0.95	-0.389236	-0.203399	1.30426e+07	2.99e-09	Spearman correlation	392	COAD
SQSTM1	IL6 JAK STAT3 SIGNALING	-0.173432	0.95	-0.270603	-0.072762	1.17805e+07	0.000774782	Spearman correlation	392	COAD
SQSTM1	INFLAMMATORY RESPONSE	-0.295486	0.95	-0.385819	-0.199541	1.30058e+07	4.75e-09	Spearman correlation	392	COAD
SQSTM1	INTERFERON GAMMA RESPONSE	-0.127369	0.95	-0.226386	-0.0257474	1.1318e+07	0.0144038	Spearman correlation	392	COAD
SQSTM1	KRAS SIGNALING DN	-0.41937	0.95	-0.49995	-0.331591	1.42495e+07	1.2e-17	Spearman correlation	392	COAD
SQSTM1	KRAS SIGNALING UP	-0.367175	0.95	-0.452203	-0.275533	1.37255e+07	1.45e-13	Spearman correlation	392	COAD
SQSTM1	MITOTIC SPINDLE	-0.473151	0.95	-0.54864	-0.390009	1.47894e+07	1.1e-22	Spearman correlation	392	COAD
SQSTM1	MYC TARGETS V1	0.221797	0.95	0.122613	0.316594	7.81263e+06	1.45e-05	Spearman correlation	392	COAD
SQSTM1	MYC TARGETS V2	0.291816	0.95	0.195681	0.382395	7.10968e+06	7.51e-09	Spearman correlation	392	COAD
SQSTM1	MYOGENESIS	-0.392598	0.95	-0.475521	-0.302761	1.39807e+07	1.84e-15	Spearman correlation	392	COAD
SQSTM1	NOTCH SIGNALING	-0.1172	0.95	-0.216568	-0.0154276	1.12159e+07	0.024562	Spearman correlation	392	COAD
SQSTM1	OXIDATIVE PHOSPHORYLATION	0.47409	0.95	0.391035	0.549486	5.27978e+06	8.82e-23	Spearman correlation	392	COAD
SQSTM1	PANCREAS BETA CELLS	-0.169072	0.95	-0.266436	-0.0682928	1.17367e+07	0.00106018	Spearman correlation	392	COAD
SQSTM1	PEROXISOME	0.137225	0.95	0.0357688	0.235881	8.66167e+06	0.00824585	Spearman correlation	392	COAD
SQSTM1	PI3K AKT MTOR SIGNALING	-0.26287	0.95	-0.355303	-0.165345	1.26783e+07	2.24e-07	Spearman correlation	392	COAD
SQSTM1	PROTEIN SECRETION	-0.315546	0.95	-0.40449	-0.22069	1.32072e+07	3.41e-10	Spearman correlation	392	COAD
SQSTM1	REACTIVE OXYGEN SPECIES PATHWAY	0.355872	0.95	0.263475	0.441798	6.46661e+06	9.02e-13	Spearman correlation	392	COAD
SQSTM1	SPERMATOGENESIS	-0.437892	0.95	-0.516777	-0.351635	1.44355e+07	2.84e-19	Spearman correlation	392	COAD
SQSTM1	TGF BETA SIGNALING	-0.354745	0.95	-0.44076	-0.262275	1.36007e+07	1.08e-12	Spearman correlation	392	COAD
SQSTM1	TNFA SIGNALING VIA NFKB	-0.143469	0.95	-0.241888	-0.0421292	1.14797e+07	0.00568064	Spearman correlation	392	COAD
SQSTM1	UNFOLDED PROTEIN RESPONSE	0.119199	0.95	0.0174549	0.2185	8.84264e+06	0.0222426	Spearman correlation	392	COAD
SQSTM1	UV RESPONSE DN	-0.481762	0.95	-0.556389	-0.399425	1.48759e+07	1.41e-23	Spearman correlation	392	COAD
SQSTM1	WNT BETA CATENIN SIGNALING	-0.175712	0.95	-0.272781	-0.0751007	1.18033e+07	0.000657619	Spearman correlation	392	COAD
SQSTM1	ADIPOGENESIS	0.439776	0.95	0.114727	0.679762	4000	0.0193748	Spearman correlation	35	DLBC
SQSTM1	DNA REPAIR	0.428291	0.95	0.100741	0.672077	4082	0.0229991	Spearman correlation	35	DLBC
SQSTM1	MITOTIC SPINDLE	-0.378992	0.95	-0.638478	-0.0421378	9846	0.0474614	Spearman correlation	35	DLBC
SQSTM1	OXIDATIVE PHOSPHORYLATION	0.403081	0.95	0.0704866	0.65502	4262	0.034296	Spearman correlation	35	DLBC
SQSTM1	PI3K AKT MTOR SIGNALING	-0.513725	0.95	-0.728018	-0.20798	10808	0.00507734	Spearman correlation	35	DLBC
SQSTM1	TGF BETA SIGNALING	-0.404762	0.95	-0.656165	-0.0724846	10030	0.033558	Spearman correlation	35	DLBC
SQSTM1	WNT BETA CATENIN SIGNALING	-0.491597	0.95	-0.713797	-0.179479	10650	0.00768822	Spearman correlation	35	DLBC
SQSTM1	ADIPOGENESIS	0.258211	0.95	0.0974459	0.405843	417238	0.00307909	Spearman correlation	150	ESCA
SQSTM1	ALLOGRAFT REJECTION	-0.243942	0.95	-0.393044	-0.0823398	699686	0.00530928	Spearman correlation	150	ESCA
SQSTM1	ANDROGEN RESPONSE	-0.226949	0.95	-0.377726	-0.0644466	690128	0.00982565	Spearman correlation	150	ESCA
SQSTM1	ANGIOGENESIS	-0.212203	0.95	-0.364366	-0.0490039	681834	0.0164504	Spearman correlation	150	ESCA
SQSTM1	APICAL JUNCTION	-0.329062	0.95	-0.468549	-0.173566	747564	0.000113882	Spearman correlation	150	ESCA
SQSTM1	APICAL SURFACE	-0.367915	0.95	-0.502349	-0.216113	769418	1.27e-05	Spearman correlation	150	ESCA
SQSTM1	CHOLESTEROL HOMEOSTASIS	0.314252	0.95	0.1575	0.455557	385716	0.000245518	Spearman correlation	150	ESCA
SQSTM1	DNA REPAIR	0.309192	0.95	0.15203	0.451105	388562	0.000311914	Spearman correlation	150	ESCA
SQSTM1	EPITHELIAL MESENCHYMAL TRANSITION	-0.355285	0.95	-0.491407	-0.202219	762314	2.73e-05	Spearman correlation	150	ESCA
SQSTM1	FATTY ACID METABOLISM	0.308517	0.95	0.151301	0.45051	388942	0.000322042	Spearman correlation	150	ESCA
SQSTM1	GLYCOLYSIS	0.30191	0.95	0.144174	0.444684	392658	0.000438167	Spearman correlation	150	ESCA
SQSTM1	HEDGEHOG SIGNALING	-0.36426	0.95	-0.499187	-0.212086	767362	1.58e-05	Spearman correlation	150	ESCA
SQSTM1	IL2 STAT5 SIGNALING	-0.252817	0.95	-0.401011	-0.0917267	704678	0.00376314	Spearman correlation	150	ESCA
SQSTM1	IL6 JAK STAT3 SIGNALING	-0.187192	0.95	-0.341562	-0.0229878	667766	0.0359175	Spearman correlation	150	ESCA
SQSTM1	INFLAMMATORY RESPONSE	-0.255786	0.95	-0.403672	-0.0948734	706348	0.00337824	Spearman correlation	150	ESCA
SQSTM1	KRAS SIGNALING DN	-0.376154	0.95	-0.509464	-0.22521	774052	7.64e-06	Spearman correlation	150	ESCA
SQSTM1	KRAS SIGNALING UP	-0.197923	0.95	-0.351369	-0.0341231	673802	0.0259593	Spearman correlation	150	ESCA
SQSTM1	MITOTIC SPINDLE	-0.255576	0.95	-0.403484	-0.094651	706230	0.00340374	Spearman correlation	150	ESCA
SQSTM1	MTORC1 SIGNALING	0.277212	0.95	0.117678	0.422798	406550	0.00135989	Spearman correlation	150	ESCA
SQSTM1	MYC TARGETS V1	0.225715	0.95	0.0631514	0.37661	435516	0.0102793	Spearman correlation	150	ESCA
SQSTM1	MYC TARGETS V2	0.368466	0.95	0.216721	0.502826	355222	1.23e-05	Spearman correlation	150	ESCA
SQSTM1	MYOGENESIS	-0.368857	0.95	-0.503164	-0.217152	769948	1.2e-05	Spearman correlation	150	ESCA
SQSTM1	NOTCH SIGNALING	-0.214205	0.95	-0.366184	-0.0510959	682960	0.0153885	Spearman correlation	150	ESCA
SQSTM1	OXIDATIVE PHOSPHORYLATION	0.459642	0.95	0.318901	0.580549	303938	1.82e-08	Spearman correlation	150	ESCA
SQSTM1	REACTIVE OXYGEN SPECIES PATHWAY	0.400962	0.95	0.252761	0.530779	336944	1.51e-06	Spearman correlation	150	ESCA
SQSTM1	SPERMATOGENESIS	-0.34295	0.95	-0.480679	-0.188709	755376	5.47e-05	Spearman correlation	150	ESCA
SQSTM1	TGF BETA SIGNALING	-0.304467	0.95	-0.44694	-0.14693	733730	0.000388675	Spearman correlation	150	ESCA
SQSTM1	UNFOLDED PROTEIN RESPONSE	0.379958	0.95	0.22942	0.512744	348758	6.08e-06	Spearman correlation	150	ESCA
SQSTM1	UV RESPONSE DN	-0.416724	0.95	-0.544237	-0.270392	796872	4.97e-07	Spearman correlation	150	ESCA
SQSTM1	WNT BETA CATENIN SIGNALING	-0.307244	0.95	-0.449388	-0.149926	735292	0.000342501	Spearman correlation	150	ESCA
SQSTM1	XENOBIOTIC METABOLISM	0.193255	0.95	0.0292736	0.347107	453774	0.0298855	Spearman correlation	150	ESCA
SQSTM1	ADIPOGENESIS	0.351394	0.95	0.187796	0.496021	254308	6.42e-05	Spearman correlation	133	GBM
SQSTM1	ALLOGRAFT REJECTION	0.329327	0.95	0.163608	0.476971	262960	0.000192993	Spearman correlation	133	GBM
SQSTM1	ANDROGEN RESPONSE	0.334296	0.95	0.169036	0.481272	261012	0.000151725	Spearman correlation	133	GBM
SQSTM1	ANGIOGENESIS	0.244912	0.95	0.0728812	0.40279	296058	0.00655644	Spearman correlation	133	GBM
SQSTM1	APOPTOSIS	0.387555	0.95	0.227866	0.526941	240130	8.73e-06	Spearman correlation	133	GBM
SQSTM1	BILE ACID METABOLISM	0.266693	0.95	0.0960212	0.422131	287518	0.00293198	Spearman correlation	133	GBM
SQSTM1	CHOLESTEROL HOMEOSTASIS	0.327313	0.95	0.161409	0.475224	263750	0.000210903	Spearman correlation	133	GBM
SQSTM1	COAGULATION	0.302777	0.95	0.134767	0.453864	273370	0.000662682	Spearman correlation	133	GBM
SQSTM1	COMPLEMENT	0.375006	0.95	0.213899	0.516253	245050	1.79e-05	Spearman correlation	133	GBM
SQSTM1	EPITHELIAL MESENCHYMAL TRANSITION	0.325466	0.95	0.159396	0.473623	264474	0.000229655	Spearman correlation	133	GBM
SQSTM1	ESTROGEN RESPONSE EARLY	0.214372	0.95	0.0407453	0.375432	308032	0.018182	Spearman correlation	133	GBM
SQSTM1	ESTROGEN RESPONSE LATE	0.22107	0.95	0.0477623	0.381456	305406	0.0147264	Spearman correlation	133	GBM
SQSTM1	FATTY ACID METABOLISM	0.218963	0.95	0.0455533	0.379563	306232	0.0157611	Spearman correlation	133	GBM
SQSTM1	G2M CHECKPOINT	-0.197014	0.95	-0.359756	-0.022638	469330	0.0308424	Spearman correlation	133	GBM
SQSTM1	GLYCOLYSIS	0.393594	0.95	0.234611	0.53207	237762	6.09e-06	Spearman correlation	133	GBM
SQSTM1	HEDGEHOG SIGNALING	-0.383877	0.95	-0.523813	-0.223766	542596	1.08e-05	Spearman correlation	133	GBM
SQSTM1	HYPOXIA	0.337111	0.95	0.172117	0.483707	259908	0.000132098	Spearman correlation	133	GBM
SQSTM1	IL2 STAT5 SIGNALING	0.416436	0.95	0.260263	0.551375	228806	1.49e-06	Spearman correlation	133	GBM
SQSTM1	IL6 JAK STAT3 SIGNALING	0.328481	0.95	0.162684	0.476237	263292	0.000200778	Spearman correlation	133	GBM
SQSTM1	INFLAMMATORY RESPONSE	0.341335	0.95	0.176745	0.487355	258252	0.00010751	Spearman correlation	133	GBM
SQSTM1	INTERFERON ALPHA RESPONSE	0.398098	0.95	0.239652	0.535888	235996	4.64e-06	Spearman correlation	133	GBM
SQSTM1	INTERFERON GAMMA RESPONSE	0.439962	0.95	0.286915	0.571108	219582	3.16e-07	Spearman correlation	133	GBM
SQSTM1	KRAS SIGNALING DN	-0.472792	0.95	-0.598394	-0.324508	577458	2.92e-08	Spearman correlation	133	GBM
SQSTM1	KRAS SIGNALING UP	0.220111	0.95	0.0467565	0.380595	305782	0.015193	Spearman correlation	133	GBM
SQSTM1	MITOTIC SPINDLE	-0.272437	0.95	-0.427208	-0.102154	498902	0.00234648	Spearman correlation	133	GBM
SQSTM1	MTORC1 SIGNALING	0.362259	0.95	0.199778	0.505351	250048	3.67e-05	Spearman correlation	133	GBM
SQSTM1	NOTCH SIGNALING	-0.268998	0.95	-0.42417	-0.0984815	497554	0.00268698	Spearman correlation	133	GBM
SQSTM1	OXIDATIVE PHOSPHORYLATION	0.254966	0.95	0.0835395	0.411735	292116	0.00454545	Spearman correlation	133	GBM
SQSTM1	P53 PATHWAY	0.443737	0.95	0.291214	0.57426	218102	2.44e-07	Spearman correlation	133	GBM
SQSTM1	PANCREAS BETA CELLS	-0.452367	0.95	-0.581453	-0.301065	569450	1.35e-07	Spearman correlation	133	GBM
SQSTM1	PEROXISOME	0.186985	0.95	0.0122288	0.350658	318770	0.0408224	Spearman correlation	133	GBM
SQSTM1	PI3K AKT MTOR SIGNALING	0.333689	0.95	0.168373	0.480747	261250	0.000156141	Spearman correlation	133	GBM
SQSTM1	PROTEIN SECRETION	0.301675	0.95	0.133576	0.452901	273802	0.000692627	Spearman correlation	133	GBM
SQSTM1	REACTIVE OXYGEN SPECIES PATHWAY	0.424812	0.95	0.269725	0.558418	225522	8.69e-07	Spearman correlation	133	GBM
SQSTM1	SPERMATOGENESIS	-0.532656	0.95	-0.647411	-0.394285	600930	1.82e-10	Spearman correlation	133	GBM
SQSTM1	TNFA SIGNALING VIA NFKB	0.387193	0.95	0.227462	0.526634	240272	8.89e-06	Spearman correlation	133	GBM
SQSTM1	UNFOLDED PROTEIN RESPONSE	0.448435	0.95	0.296572	0.578178	216260	1.77e-07	Spearman correlation	133	GBM
SQSTM1	WNT BETA CATENIN SIGNALING	-0.400664	0.95	-0.538061	-0.242527	549178	3.96e-06	Spearman correlation	133	GBM
SQSTM1	XENOBIOTIC METABOLISM	0.358189	0.95	0.195283	0.501859	251644	4.53e-05	Spearman correlation	133	GBM
SQSTM1	ANDROGEN RESPONSE	-0.173017	0.95	-0.260898	-0.0822918	2.17564e+07	0.00023078	Spearman correlation	481	HNSC
SQSTM1	ANGIOGENESIS	-0.256767	0.95	-0.34075	-0.168718	2.33097e+07	2.59e-08	Spearman correlation	481	HNSC
SQSTM1	APICAL JUNCTION	-0.213238	0.95	-0.299397	-0.123628	2.25024e+07	4.67e-06	Spearman correlation	481	HNSC
SQSTM1	APICAL SURFACE	-0.289186	0.95	-0.371339	-0.202541	2.3911e+07	2.69e-10	Spearman correlation	481	HNSC
SQSTM1	BILE ACID METABOLISM	-0.221346	0.95	-0.307125	-0.131999	2.26527e+07	1.91e-06	Spearman correlation	481	HNSC
SQSTM1	COAGULATION	-0.189091	0.95	-0.276318	-0.0987745	2.20545e+07	5.38e-05	Spearman correlation	481	HNSC
SQSTM1	COMPLEMENT	-0.115433	0.95	-0.205287	-0.0236481	2.06883e+07	0.0156838	Spearman correlation	481	HNSC
SQSTM1	DNA REPAIR	0.182337	0.95	0.0918431	0.269845	1.51655e+07	0.000100232	Spearman correlation	481	HNSC
SQSTM1	EPITHELIAL MESENCHYMAL TRANSITION	-0.211186	0.95	-0.297441	-0.121512	2.24643e+07	5.81e-06	Spearman correlation	481	HNSC
SQSTM1	ESTROGEN RESPONSE EARLY	-0.200265	0.95	-0.28701	-0.110261	2.22617e+07	1.81e-05	Spearman correlation	481	HNSC
SQSTM1	ESTROGEN RESPONSE LATE	-0.268125	0.95	-0.351487	-0.180545	2.35204e+07	5.58e-09	Spearman correlation	481	HNSC
SQSTM1	FATTY ACID METABOLISM	-0.144405	0.95	-0.23334	-0.0530748	2.12257e+07	0.00226792	Spearman correlation	481	HNSC
SQSTM1	HEDGEHOG SIGNALING	-0.335991	0.95	-0.415188	-0.25174	2.47791e+07	1.3e-13	Spearman correlation	481	HNSC
SQSTM1	HEME METABOLISM	-0.167562	0.95	-0.255655	-0.0767091	2.16552e+07	0.000367731	Spearman correlation	481	HNSC
SQSTM1	IL2 STAT5 SIGNALING	-0.133854	0.95	-0.223141	-0.0423399	2.103e+07	0.00482941	Spearman correlation	481	HNSC
SQSTM1	INTERFERON ALPHA RESPONSE	0.141489	0.95	0.0501054	0.230522	1.59231e+07	0.00279003	Spearman correlation	481	HNSC
SQSTM1	KRAS SIGNALING DN	-0.49603	0.95	-0.562391	-0.42332	2.77474e+07	2.59e-30	Spearman correlation	481	HNSC
SQSTM1	KRAS SIGNALING UP	-0.209253	0.95	-0.295596	-0.119519	2.24284e+07	7.15e-06	Spearman correlation	481	HNSC
SQSTM1	MITOTIC SPINDLE	-0.159268	0.95	-0.247673	-0.0682328	2.15014e+07	0.000732291	Spearman correlation	481	HNSC
SQSTM1	MTORC1 SIGNALING	0.108796	0.95	0.01693	0.198841	1.65295e+07	0.0229933	Spearman correlation	481	HNSC
SQSTM1	MYC TARGETS V1	0.11988	0.95	0.0281549	0.209603	1.63239e+07	0.0119913	Spearman correlation	481	HNSC
SQSTM1	MYC TARGETS V2	0.134464	0.95	0.0429596	0.223731	1.60534e+07	0.00462814	Spearman correlation	481	HNSC
SQSTM1	MYOGENESIS	-0.157768	0.95	-0.246229	-0.0667011	2.14735e+07	0.00082366	Spearman correlation	481	HNSC
SQSTM1	OXIDATIVE PHOSPHORYLATION	0.247029	0.95	0.158599	0.331527	1.39656e+07	8.96e-08	Spearman correlation	481	HNSC
SQSTM1	P53 PATHWAY	0.214697	0.95	0.125134	0.300789	1.45653e+07	3.98e-06	Spearman correlation	481	HNSC
SQSTM1	PANCREAS BETA CELLS	-0.371753	0.95	-0.448446	-0.289627	2.54424e+07	1.36e-16	Spearman correlation	481	HNSC
SQSTM1	PEROXISOME	-0.155492	0.95	-0.244035	-0.0643772	2.14313e+07	0.000975493	Spearman correlation	481	HNSC
SQSTM1	PROTEIN SECRETION	-0.0954879	0.95	-0.18589	-0.00348279	2.03184e+07	0.0473232	Spearman correlation	481	HNSC
SQSTM1	REACTIVE OXYGEN SPECIES PATHWAY	0.154494	0.95	0.0633592	0.243073	1.56819e+07	0.00105498	Spearman correlation	481	HNSC
SQSTM1	SPERMATOGENESIS	-0.448375	0.95	-0.518994	-0.371677	2.68635e+07	2.24e-24	Spearman correlation	481	HNSC
SQSTM1	TGF BETA SIGNALING	-0.0956734	0.95	-0.186071	-0.00367002	2.03218e+07	0.0468988	Spearman correlation	481	HNSC
SQSTM1	TNFA SIGNALING VIA NFKB	0.125762	0.95	0.0341207	0.215305	1.62148e+07	0.00825876	Spearman correlation	481	HNSC
SQSTM1	UNFOLDED PROTEIN RESPONSE	0.126386	0.95	0.0347546	0.21591	1.62032e+07	0.0079335	Spearman correlation	481	HNSC
SQSTM1	UV RESPONSE DN	-0.20849	0.95	-0.294868	-0.118733	2.24143e+07	7.75e-06	Spearman correlation	481	HNSC
SQSTM1	WNT BETA CATENIN SIGNALING	-0.347806	0.95	-0.426199	-0.264228	2.49982e+07	1.49e-14	Spearman correlation	481	HNSC
SQSTM1	XENOBIOTIC METABOLISM	-0.191029	0.95	-0.278174	-0.100765	2.20905e+07	4.48e-05	Spearman correlation	481	HNSC
SQSTM1	APICAL JUNCTION	-0.320513	0.95	-0.530316	-0.0737181	57680	0.0212952	Spearman correlation	64	KICH
SQSTM1	MYOGENESIS	-0.347848	0.95	-0.552074	-0.104247	58874	0.0115069	Spearman correlation	64	KICH
SQSTM1	OXIDATIVE PHOSPHORYLATION	0.351465	0.95	0.108321	0.554933	28328	0.0105516	Spearman correlation	64	KICH
SQSTM1	ADIPOGENESIS	0.482571	0.95	0.392345	0.563599	3.07102e+06	8.11e-20	Spearman correlation	329	KIRC
SQSTM1	ANGIOGENESIS	-0.318263	0.95	-0.414866	-0.214565	7.8241e+06	9.69e-09	Spearman correlation	329	KIRC
SQSTM1	APICAL JUNCTION	-0.428899	0.95	-0.515586	-0.333522	8.48075e+06	1.77e-15	Spearman correlation	329	KIRC
SQSTM1	APICAL SURFACE	-0.176513	0.95	-0.282266	-0.066521	6.98279e+06	0.0021591	Spearman correlation	329	KIRC
SQSTM1	APOPTOSIS	-0.141919	0.95	-0.24928	-0.031112	6.77747e+06	0.0147567	Spearman correlation	329	KIRC
SQSTM1	BILE ACID METABOLISM	0.369638	0.95	0.269423	0.461932	3.7413e+06	1.53e-11	Spearman correlation	329	KIRC
SQSTM1	CHOLESTEROL HOMEOSTASIS	0.269507	0.95	0.163101	0.369716	4.33559e+06	1.58e-06	Spearman correlation	329	KIRC
SQSTM1	DNA REPAIR	0.375135	0.95	0.275332	0.466938	3.70867e+06	7.15e-12	Spearman correlation	329	KIRC
SQSTM1	E2F TARGETS	0.117899	0.95	0.00668811	0.226229	5.23541e+06	0.0443617	Spearman correlation	329	KIRC
SQSTM1	EPITHELIAL MESENCHYMAL TRANSITION	-0.246056	0.95	-0.347829	-0.138551	7.39554e+06	1.3e-05	Spearman correlation	329	KIRC
SQSTM1	FATTY ACID METABOLISM	0.355307	0.95	0.254055	0.448855	3.82636e+06	1.03e-10	Spearman correlation	329	KIRC
SQSTM1	GLYCOLYSIS	0.146755	0.95	0.0360453	0.253906	5.06415e+06	0.0115747	Spearman correlation	329	KIRC
SQSTM1	HEDGEHOG SIGNALING	-0.207764	0.95	-0.311852	-0.0987494	7.16827e+06	0.000268924	Spearman correlation	329	KIRC
SQSTM1	HYPOXIA	-0.186669	0.95	-0.291903	-0.07697	7.04307e+06	0.0011363	Spearman correlation	329	KIRC
SQSTM1	IL2 STAT5 SIGNALING	-0.214248	0.95	-0.317965	-0.105464	7.20676e+06	0.00016671	Spearman correlation	329	KIRC
SQSTM1	INFLAMMATORY RESPONSE	-0.213922	0.95	-0.317657	-0.105126	7.20482e+06	0.000170737	Spearman correlation	329	KIRC
SQSTM1	KRAS SIGNALING DN	-0.377291	0.95	-0.468899	-0.277651	8.17444e+06	5.27e-12	Spearman correlation	329	KIRC
SQSTM1	KRAS SIGNALING UP	-0.17046	0.95	-0.276513	-0.0603059	6.94687e+06	0.00309346	Spearman correlation	329	KIRC
SQSTM1	MITOTIC SPINDLE	-0.362829	0.95	-0.455724	-0.262115	8.08861e+06	3.85e-11	Spearman correlation	329	KIRC
SQSTM1	MTORC1 SIGNALING	0.407423	0.95	0.31019	0.49622	3.51704e+06	6.04e-14	Spearman correlation	329	KIRC
SQSTM1	MYC TARGETS V1	0.356101	0.95	0.254905	0.449581	3.82164e+06	9.33e-11	Spearman correlation	329	KIRC
SQSTM1	MYC TARGETS V2	0.373126	0.95	0.273172	0.465109	3.7206e+06	9.48e-12	Spearman correlation	329	KIRC
SQSTM1	MYOGENESIS	-0.301774	0.95	-0.39965	-0.197095	7.72624e+06	6.18e-08	Spearman correlation	329	KIRC
SQSTM1	NOTCH SIGNALING	-0.299483	0.95	-0.397531	-0.194673	7.71264e+06	7.88e-08	Spearman correlation	329	KIRC
SQSTM1	OXIDATIVE PHOSPHORYLATION	0.516798	0.95	0.430247	0.593934	2.86788e+06	5.36e-23	Spearman correlation	329	KIRC
SQSTM1	PEROXISOME	0.390067	0.95	0.29142	0.480505	3.62005e+06	8.31e-13	Spearman correlation	329	KIRC
SQSTM1	PROTEIN SECRETION	0.17709	0.95	0.0671145	0.282814	4.8841e+06	0.00208821	Spearman correlation	329	KIRC
SQSTM1	REACTIVE OXYGEN SPECIES PATHWAY	0.466284	0.95	0.374416	0.549087	3.16769e+06	2.01e-18	Spearman correlation	329	KIRC
SQSTM1	SPERMATOGENESIS	-0.129232	0.95	-0.23712	-0.0181952	6.70217e+06	0.026897	Spearman correlation	329	KIRC
SQSTM1	TGF BETA SIGNALING	-0.432709	0.95	-0.519012	-0.337673	8.50336e+06	9.2e-16	Spearman correlation	329	KIRC
SQSTM1	TNFA SIGNALING VIA NFKB	-0.134842	0.95	-0.242501	-0.0239022	6.73547e+06	0.0207838	Spearman correlation	329	KIRC
SQSTM1	UNFOLDED PROTEIN RESPONSE	0.258586	0.95	0.151652	0.359537	4.40041e+06	4.35e-06	Spearman correlation	329	KIRC
SQSTM1	UV RESPONSE DN	-0.418221	0.95	-0.505968	-0.321906	8.41737e+06	1.04e-14	Spearman correlation	329	KIRC
SQSTM1	WNT BETA CATENIN SIGNALING	-0.495729	0.95	-0.575287	-0.40688	8.87739e+06	5.43e-21	Spearman correlation	329	KIRC
SQSTM1	XENOBIOTIC METABOLISM	0.273716	0.95	0.167521	0.373633	4.31061e+06	1.07e-06	Spearman correlation	329	KIRC
SQSTM1	ADIPOGENESIS	0.579475	0.95	0.492129	0.655269	1426010	4.38e-25	Spearman correlation	273	KIRP
SQSTM1	ALLOGRAFT REJECTION	0.133053	0.95	0.0110403	0.251162	2939838	0.0364655	Spearman correlation	273	KIRP
SQSTM1	ANDROGEN RESPONSE	0.298601	0.95	0.183089	0.40598	2378462	9.46e-07	Spearman correlation	273	KIRP
SQSTM1	ANGIOGENESIS	-0.242643	0.95	-0.35433	-0.124131	4213832	8.32e-05	Spearman correlation	273	KIRP
SQSTM1	APICAL JUNCTION	-0.321983	0.95	-0.427361	-0.207973	4482876	1.08e-07	Spearman correlation	273	KIRP
SQSTM1	BILE ACID METABOLISM	0.490291	0.95	0.391557	0.577863	1728436	2.57e-17	Spearman correlation	273	KIRP
SQSTM1	CHOLESTEROL HOMEOSTASIS	0.425634	0.95	0.32009	0.520743	1947688	5.85e-13	Spearman correlation	273	KIRP
SQSTM1	COAGULATION	0.205929	0.95	0.0858982	0.320067	2692714	0.00094003	Spearman correlation	273	KIRP
SQSTM1	COMPLEMENT	0.223675	0.95	0.104334	0.336665	2632538	0.000306138	Spearman correlation	273	KIRP
SQSTM1	DNA REPAIR	0.210205	0.95	0.090333	0.324073	2678214	0.000725389	Spearman correlation	273	KIRP
SQSTM1	E2F TARGETS	0.144172	0.95	0.0223743	0.261753	2902132	0.022719	Spearman correlation	273	KIRP
SQSTM1	FATTY ACID METABOLISM	0.587145	0.95	0.500889	0.661853	1400002	7.28e-26	Spearman correlation	273	KIRP
SQSTM1	GLYCOLYSIS	0.330386	0.95	0.216953	0.435017	2270676	4.69e-08	Spearman correlation	273	KIRP
SQSTM1	HEDGEHOG SIGNALING	0.133422	0.95	0.0114155	0.251513	2938588	0.0359709	Spearman correlation	273	KIRP
SQSTM1	HEME METABOLISM	0.281439	0.95	0.164919	0.390212	2436656	4.13e-06	Spearman correlation	273	KIRP
SQSTM1	KRAS SIGNALING DN	-0.181418	0.95	-0.297026	-0.0605682	4006216	0.0037748	Spearman correlation	273	KIRP
SQSTM1	MTORC1 SIGNALING	0.693408	0.95	0.624095	0.751893	1039660	2.63e-39	Spearman correlation	273	KIRP
SQSTM1	MYC TARGETS V1	0.432488	0.95	0.327609	0.526839	1924446	2.23e-13	Spearman correlation	273	KIRP
SQSTM1	MYC TARGETS V2	0.569508	0.95	0.480773	0.646697	1459808	4.16e-24	Spearman correlation	273	KIRP
SQSTM1	NOTCH SIGNALING	-0.422564	0.95	-0.518009	-0.316725	4823948	8.83e-13	Spearman correlation	273	KIRP
SQSTM1	OXIDATIVE PHOSPHORYLATION	0.466923	0.95	0.36559	0.557318	1807676	1.23e-15	Spearman correlation	273	KIRP
SQSTM1	PANCREAS BETA CELLS	0.343514	0.95	0.231019	0.446946	2226160	1.21e-08	Spearman correlation	273	KIRP
SQSTM1	PEROXISOME	0.57503	0.95	0.487061	0.651449	1441082	1.19e-24	Spearman correlation	273	KIRP
SQSTM1	PI3K AKT MTOR SIGNALING	0.200833	0.95	0.0806187	0.315288	2709996	0.00127269	Spearman correlation	273	KIRP
SQSTM1	PROTEIN SECRETION	0.319496	0.95	0.20532	0.425093	2307604	1.37e-07	Spearman correlation	273	KIRP
SQSTM1	REACTIVE OXYGEN SPECIES PATHWAY	0.617005	0.95	0.535161	0.687374	1298744	4.27e-29	Spearman correlation	273	KIRP
SQSTM1	SPERMATOGENESIS	-0.196625	0.95	-0.311337	-0.0762651	4057784	0.00161448	Spearman correlation	273	KIRP
SQSTM1	TGF BETA SIGNALING	-0.467938	0.95	-0.558212	-0.366714	4977812	1.05e-15	Spearman correlation	273	KIRP
SQSTM1	UNFOLDED PROTEIN RESPONSE	0.579013	0.95	0.491602	0.654872	1427578	4.84e-25	Spearman correlation	273	KIRP
SQSTM1	UV RESPONSE DN	-0.178826	0.95	-0.294581	-0.0578986	3997426	0.00430146	Spearman correlation	273	KIRP
SQSTM1	UV RESPONSE UP	0.351522	0.95	0.239622	0.454204	2199006	5.2e-09	Spearman correlation	273	KIRP
SQSTM1	WNT BETA CATENIN SIGNALING	-0.258676	0.95	-0.369199	-0.140939	4268202	2.56e-05	Spearman correlation	273	KIRP
SQSTM1	XENOBIOTIC METABOLISM	0.426893	0.95	0.321469	0.521863	1943420	4.91e-13	Spearman correlation	273	KIRP
SQSTM1	ADIPOGENESIS	0.343363	0.95	0.259708	0.421903	12331438	1.62e-14	Spearman correlation	483	LGG
SQSTM1	ALLOGRAFT REJECTION	0.226079	0.95	0.137081	0.311457	14533984	7.73e-07	Spearman correlation	483	LGG
SQSTM1	ANGIOGENESIS	0.109214	0.95	0.0175456	0.199062	16728672	0.0192562	Spearman correlation	483	LGG
SQSTM1	APICAL JUNCTION	-0.117086	0.95	-0.206708	-0.0255154	20978520	0.0119972	Spearman correlation	483	LGG
SQSTM1	APOPTOSIS	0.255442	0.95	0.167527	0.339326	13982568	1.97e-08	Spearman correlation	483	LGG
SQSTM1	COAGULATION	0.145149	0.95	0.0540246	0.233876	16053828	0.00174114	Spearman correlation	483	LGG
SQSTM1	COMPLEMENT	0.213799	0.95	0.124397	0.299757	14764612	3.08e-06	Spearman correlation	483	LGG
SQSTM1	DNA REPAIR	0.244814	0.95	0.156488	0.329256	14182154	7.87e-08	Spearman correlation	483	LGG
SQSTM1	E2F TARGETS	-0.127547	0.95	-0.216852	-0.0361253	21174976	0.00611802	Spearman correlation	483	LGG
SQSTM1	EPITHELIAL MESENCHYMAL TRANSITION	0.121885	0.95	0.0303802	0.211364	16490724	0.00884239	Spearman correlation	483	LGG
SQSTM1	FATTY ACID METABOLISM	0.168991	0.95	0.0783621	0.256849	15606092	0.000254427	Spearman correlation	483	LGG
SQSTM1	G2M CHECKPOINT	-0.187778	0.95	-0.274882	-0.0976163	22306088	4.54e-05	Spearman correlation	483	LGG
SQSTM1	GLYCOLYSIS	0.128332	0.95	0.036922	0.217612	16369656	0.00581756	Spearman correlation	483	LGG
SQSTM1	HEDGEHOG SIGNALING	-0.233418	0.95	-0.318436	-0.144675	23163206	3.23e-07	Spearman correlation	483	LGG
SQSTM1	HYPOXIA	0.238094	0.95	0.149519	0.322878	14308354	1.83e-07	Spearman correlation	483	LGG
SQSTM1	IL2 STAT5 SIGNALING	0.212501	0.95	0.123058	0.298519	14788986	3.55e-06	Spearman correlation	483	LGG
SQSTM1	IL6 JAK STAT3 SIGNALING	0.231092	0.95	0.142267	0.316225	14439844	4.28e-07	Spearman correlation	483	LGG
SQSTM1	INFLAMMATORY RESPONSE	0.176999	0.95	0.0865609	0.264543	15455706	0.000124783	Spearman correlation	483	LGG
SQSTM1	INTERFERON ALPHA RESPONSE	0.332267	0.95	0.24799	0.411553	12539810	1.25e-13	Spearman correlation	483	LGG
SQSTM1	INTERFERON GAMMA RESPONSE	0.299238	0.95	0.213254	0.380622	13160088	3.32e-11	Spearman correlation	483	LGG
SQSTM1	KRAS SIGNALING DN	-0.381636	0.95	-0.457447	-0.300318	25946688	7.51e-18	Spearman correlation	483	LGG
SQSTM1	KRAS SIGNALING UP	0.127603	0.95	0.0361822	0.216906	16383340	0.00610031	Spearman correlation	483	LGG
SQSTM1	MITOTIC SPINDLE	-0.31242	0.95	-0.392988	-0.227091	24646830	3.88e-12	Spearman correlation	483	LGG
SQSTM1	MTORC1 SIGNALING	0.162286	0.95	0.0715073	0.250399	15731998	0.000449212	Spearman correlation	483	LGG
SQSTM1	MYC TARGETS V1	0.166715	0.95	0.076034	0.25466	15648836	0.000308528	Spearman correlation	483	LGG
SQSTM1	MYC TARGETS V2	0.227321	0.95	0.138365	0.312638	14510670	6.69e-07	Spearman correlation	483	LGG
SQSTM1	OXIDATIVE PHOSPHORYLATION	0.308769	0.95	0.223256	0.389567	12981092	7.12e-12	Spearman correlation	483	LGG
SQSTM1	P53 PATHWAY	0.334423	0.95	0.250265	0.413565	12499326	8.45e-14	Spearman correlation	483	LGG
SQSTM1	PANCREAS BETA CELLS	-0.293214	0.95	-0.374961	-0.206942	24286144	8.52e-11	Spearman correlation	483	LGG
SQSTM1	PI3K AKT MTOR SIGNALING	0.231574	0.95	0.142765	0.316683	14430806	4.04e-07	Spearman correlation	483	LGG
SQSTM1	PROTEIN SECRETION	0.216177	0.95	0.126851	0.302025	14719948	2.38e-06	Spearman correlation	483	LGG
SQSTM1	REACTIVE OXYGEN SPECIES PATHWAY	0.329652	0.95	0.245232	0.40911	12588922	1.99e-13	Spearman correlation	483	LGG
SQSTM1	SPERMATOGENESIS	-0.544392	0.95	-0.60594	-0.476366	29003200	4.72e-38	Spearman correlation	483	LGG
SQSTM1	TGF BETA SIGNALING	0.191294	0.95	0.101228	0.278251	15187234	3.23e-05	Spearman correlation	483	LGG
SQSTM1	TNFA SIGNALING VIA NFKB	0.232948	0.95	0.144188	0.31799	14404988	3.42e-07	Spearman correlation	483	LGG
SQSTM1	UNFOLDED PROTEIN RESPONSE	0.399169	0.95	0.31902	0.473649	11283414	1.58e-19	Spearman correlation	483	LGG
SQSTM1	UV RESPONSE DN	-0.1297	0.95	-0.218937	-0.0383114	21215406	0.00530459	Spearman correlation	483	LGG
SQSTM1	UV RESPONSE UP	0.221454	0.95	0.1323	0.307053	14620850	1.32e-06	Spearman correlation	483	LGG
SQSTM1	XENOBIOTIC METABOLISM	0.237156	0.95	0.148546	0.321987	14325976	2.05e-07	Spearman correlation	483	LGG
SQSTM1	ALLOGRAFT REJECTION	-0.190083	0.95	-0.29243	-0.0834311	8287260	0.000549195	Spearman correlation	347	LIHC
SQSTM1	ANDROGEN RESPONSE	-0.16585	0.95	-0.269379	-0.0585307	8118506	0.00265504	Spearman correlation	347	LIHC
SQSTM1	ANGIOGENESIS	-0.349081	0.95	-0.440777	-0.250174	9394456	5.06e-11	Spearman correlation	347	LIHC
SQSTM1	APICAL JUNCTION	-0.445527	0.95	-0.528387	-0.354261	10066068	7.57e-18	Spearman correlation	347	LIHC
SQSTM1	APICAL SURFACE	-0.337583	0.95	-0.430215	-0.237916	9314388	2.39e-10	Spearman correlation	347	LIHC
SQSTM1	APOPTOSIS	-0.264542	0.95	-0.36252	-0.16078	8805760	1.01e-06	Spearman correlation	347	LIHC
SQSTM1	BILE ACID METABOLISM	0.219867	0.95	0.114217	0.320599	5432532	5.69e-05	Spearman correlation	347	LIHC
SQSTM1	COMPLEMENT	-0.172098	0.95	-0.275334	-0.0649383	8162018	0.00180868	Spearman correlation	347	LIHC
SQSTM1	DNA REPAIR	0.135141	0.95	0.027168	0.239997	6022528	0.0149676	Spearman correlation	347	LIHC
SQSTM1	E2F TARGETS	-0.174446	0.95	-0.27757	-0.0673483	8178368	0.00155882	Spearman correlation	347	LIHC
SQSTM1	EPITHELIAL MESENCHYMAL TRANSITION	-0.396365	0.95	-0.483949	-0.30092	9723724	4.3e-14	Spearman correlation	347	LIHC
SQSTM1	ESTROGEN RESPONSE EARLY	-0.293869	0.95	-0.389826	-0.1916	9009984	4.79e-08	Spearman correlation	347	LIHC
SQSTM1	ESTROGEN RESPONSE LATE	-0.397279	0.95	-0.484779	-0.301906	9730088	3.71e-14	Spearman correlation	347	LIHC
SQSTM1	FATTY ACID METABOLISM	0.154659	0.95	0.0470773	0.258694	5886612	0.0051334	Spearman correlation	347	LIHC
SQSTM1	G2M CHECKPOINT	-0.238541	0.95	-0.33817	-0.133624	8624698	1.17e-05	Spearman correlation	347	LIHC
SQSTM1	GLYCOLYSIS	-0.232838	0.95	-0.332811	-0.127689	8584986	1.91e-05	Spearman correlation	347	LIHC
SQSTM1	HEDGEHOG SIGNALING	-0.406736	0.95	-0.493361	-0.312123	9795942	7.74e-15	Spearman correlation	347	LIHC
SQSTM1	HEME METABOLISM	-0.111113	0.95	-0.216873	-0.00277574	7737344	0.0470133	Spearman correlation	347	LIHC
SQSTM1	HYPOXIA	-0.287062	0.95	-0.383503	-0.184428	8962580	1e-07	Spearman correlation	347	LIHC
SQSTM1	IL2 STAT5 SIGNALING	-0.242726	0.95	-0.342099	-0.137985	8653844	8.05e-06	Spearman correlation	347	LIHC
SQSTM1	IL6 JAK STAT3 SIGNALING	-0.200055	0.95	-0.301881	-0.0937161	8356700	0.000266221	Spearman correlation	347	LIHC
SQSTM1	INFLAMMATORY RESPONSE	-0.30783	0.95	-0.402765	-0.206343	9107200	9.62e-09	Spearman correlation	347	LIHC
SQSTM1	KRAS SIGNALING DN	-0.459662	0.95	-0.54108	-0.369708	10164496	4.8e-19	Spearman correlation	347	LIHC
SQSTM1	KRAS SIGNALING UP	-0.31555	0.95	-0.409903	-0.214514	9160956	3.83e-09	Spearman correlation	347	LIHC
SQSTM1	MITOTIC SPINDLE	-0.422475	0.95	-0.507606	-0.329175	9905542	5.19e-16	Spearman correlation	347	LIHC
SQSTM1	MYC TARGETS V2	0.351231	0.95	0.25247	0.44275	4517762	3.76e-11	Spearman correlation	347	LIHC
SQSTM1	MYOGENESIS	-0.397744	0.95	-0.485201	-0.302408	9733326	3.45e-14	Spearman correlation	347	LIHC
SQSTM1	NOTCH SIGNALING	-0.404802	0.95	-0.491607	-0.310032	9782474	1.07e-14	Spearman correlation	347	LIHC
SQSTM1	OXIDATIVE PHOSPHORYLATION	0.350661	0.95	0.251861	0.442227	4521734	4.07e-11	Spearman correlation	347	LIHC
SQSTM1	P53 PATHWAY	-0.182021	0.95	-0.284775	-0.0751323	8231118	0.000950729	Spearman correlation	347	LIHC
SQSTM1	PANCREAS BETA CELLS	-0.158228	0.95	-0.262105	-0.0507269	8065432	0.00419002	Spearman correlation	347	LIHC
SQSTM1	PEROXISOME	0.127308	0.95	0.019202	0.232472	6077074	0.0220581	Spearman correlation	347	LIHC
SQSTM1	PI3K AKT MTOR SIGNALING	-0.292048	0.95	-0.388135	-0.189681	8997302	5.83e-08	Spearman correlation	347	LIHC
SQSTM1	PROTEIN SECRETION	-0.180752	0.95	-0.283569	-0.0738275	8222282	0.00103371	Spearman correlation	347	LIHC
SQSTM1	REACTIVE OXYGEN SPECIES PATHWAY	0.233795	0.95	0.128685	0.333711	5335540	1.76e-05	Spearman correlation	347	LIHC
SQSTM1	SPERMATOGENESIS	-0.46811	0.95	-0.548648	-0.378963	10223322	8.59e-20	Spearman correlation	347	LIHC
SQSTM1	TGF BETA SIGNALING	-0.431407	0.95	-0.515669	-0.338879	9967738	1.05e-16	Spearman correlation	347	LIHC
SQSTM1	TNFA SIGNALING VIA NFKB	-0.185001	0.95	-0.287606	-0.0781975	8251866	0.000778171	Spearman correlation	347	LIHC
SQSTM1	UNFOLDED PROTEIN RESPONSE	0.142396	0.95	0.0345586	0.246956	5972006	0.0101678	Spearman correlation	347	LIHC
SQSTM1	UV RESPONSE DN	-0.366438	0.95	-0.456674	-0.268739	9515320	4.33e-12	Spearman correlation	347	LIHC
SQSTM1	UV RESPONSE UP	-0.160379	0.95	-0.264159	-0.0529285	8080414	0.00369247	Spearman correlation	347	LIHC
SQSTM1	WNT BETA CATENIN SIGNALING	-0.151044	0.95	-0.255237	-0.0433835	8015408	0.00632507	Spearman correlation	347	LIHC
SQSTM1	XENOBIOTIC METABOLISM	0.218256	0.95	0.112547	0.31908	5443748	6.46e-05	Spearman correlation	347	LIHC
SQSTM1	ADIPOGENESIS	0.276756	0.95	0.192383	0.357066	1.62736e+07	4.05e-10	Spearman correlation	513	LUAD
SQSTM1	ALLOGRAFT REJECTION	-0.103352	0.95	-0.190713	-0.0143674	2.48264e+07	0.025646	Spearman correlation	513	LUAD
SQSTM1	ANGIOGENESIS	-0.184084	0.95	-0.268791	-0.0965502	2.66429e+07	4.64e-05	Spearman correlation	513	LUAD
SQSTM1	APICAL JUNCTION	-0.232821	0.95	-0.315395	-0.146749	2.77395e+07	1.87e-07	Spearman correlation	513	LUAD
SQSTM1	APICAL SURFACE	-0.156385	0.95	-0.242127	-0.0682179	2.60197e+07	0.000589943	Spearman correlation	513	LUAD
SQSTM1	CHOLESTEROL HOMEOSTASIS	0.17795	0.95	0.0902637	0.262898	1.84968e+07	8.42e-05	Spearman correlation	513	LUAD
SQSTM1	COAGULATION	-0.107612	0.95	-0.194861	-0.0186737	2.49222e+07	0.0198777	Spearman correlation	513	LUAD
SQSTM1	COMPLEMENT	-0.09913	0.95	-0.186599	-0.0101019	2.47314e+07	0.0325978	Spearman correlation	513	LUAD
SQSTM1	DNA REPAIR	0.232992	0.95	0.146926	0.315558	1.72583e+07	1.83e-07	Spearman correlation	513	LUAD
SQSTM1	EPITHELIAL MESENCHYMAL TRANSITION	-0.18588	0.95	-0.270516	-0.0983921	2.66833e+07	3.88e-05	Spearman correlation	513	LUAD
SQSTM1	FATTY ACID METABOLISM	0.213727	0.95	0.127029	0.297184	1.76918e+07	1.89e-06	Spearman correlation	513	LUAD
SQSTM1	GLYCOLYSIS	0.14491	0.95	0.0565223	0.231043	1.92403e+07	0.00148599	Spearman correlation	513	LUAD
SQSTM1	HEDGEHOG SIGNALING	-0.27644	0.95	-0.356768	-0.192054	2.8721e+07	4.24e-10	Spearman correlation	513	LUAD
SQSTM1	IL2 STAT5 SIGNALING	-0.154005	0.95	-0.239831	-0.0657906	2.59661e+07	0.000718473	Spearman correlation	513	LUAD
SQSTM1	IL6 JAK STAT3 SIGNALING	-0.121159	0.95	-0.20803	-0.0323915	2.5227e+07	0.00836458	Spearman correlation	513	LUAD
SQSTM1	INFLAMMATORY RESPONSE	-0.149544	0.95	-0.235522	-0.0612427	2.58657e+07	0.00103049	Spearman correlation	513	LUAD
SQSTM1	KRAS SIGNALING DN	-0.373301	0.95	-0.44753	-0.293963	3.09005e+07	7.09e-18	Spearman correlation	513	LUAD
SQSTM1	KRAS SIGNALING UP	-0.147904	0.95	-0.233938	-0.0595716	2.58288e+07	0.00117489	Spearman correlation	513	LUAD
SQSTM1	MITOTIC SPINDLE	-0.0951353	0.95	-0.182704	-0.00606938	2.46415e+07	0.0407281	Spearman correlation	513	LUAD
SQSTM1	MTORC1 SIGNALING	0.224351	0.95	0.137993	0.307324	1.74528e+07	5.31e-07	Spearman correlation	513	LUAD
SQSTM1	MYC TARGETS V1	0.203007	0.95	0.115988	0.286933	1.7933e+07	6.38e-06	Spearman correlation	513	LUAD
SQSTM1	MYC TARGETS V2	0.235573	0.95	0.149596	0.318014	1.72003e+07	1.31e-07	Spearman correlation	513	LUAD
SQSTM1	MYOGENESIS	-0.305456	0.95	-0.384117	-0.222393	2.93739e+07	3.81e-12	Spearman correlation	513	LUAD
SQSTM1	NOTCH SIGNALING	-0.180113	0.95	-0.264977	-0.0924798	2.65536e+07	6.83e-05	Spearman correlation	513	LUAD
SQSTM1	OXIDATIVE PHOSPHORYLATION	0.333081	0.95	0.251426	0.410027	15006262	2.63e-14	Spearman correlation	513	LUAD
SQSTM1	PANCREAS BETA CELLS	-0.254218	0.95	-0.335729	-0.168928	2.8221e+07	1.08e-08	Spearman correlation	513	LUAD
SQSTM1	PROTEIN SECRETION	0.177339	0.95	0.0896386	0.262311	1.85106e+07	8.9e-05	Spearman correlation	513	LUAD
SQSTM1	REACTIVE OXYGEN SPECIES PATHWAY	0.422108	0.95	0.346006	0.492692	1.30031e+07	6.15e-23	Spearman correlation	513	LUAD
SQSTM1	SPERMATOGENESIS	-0.283044	0.95	-0.363004	-0.198944	2.88696e+07	1.51e-10	Spearman correlation	513	LUAD
SQSTM1	TGF BETA SIGNALING	-0.174332	0.95	-0.259419	-0.0865598	2.64235e+07	0.000119182	Spearman correlation	513	LUAD
SQSTM1	UNFOLDED PROTEIN RESPONSE	0.201669	0.95	0.114612	0.285653	1.79631e+07	7.36e-06	Spearman correlation	513	LUAD
SQSTM1	UV RESPONSE DN	-0.208128	0.95	-0.291833	-0.12126	2.71839e+07	3.6e-06	Spearman correlation	513	LUAD
SQSTM1	WNT BETA CATENIN SIGNALING	-0.240695	0.95	-0.322886	-0.1549	2.79167e+07	6.79e-08	Spearman correlation	513	LUAD
SQSTM1	XENOBIOTIC METABOLISM	0.103788	0.95	0.0148078	0.191138	2.01655e+07	0.0250243	Spearman correlation	513	LUAD
SQSTM1	ADIPOGENESIS	0.112452	0.95	0.0201438	0.20286	1.59536e+07	0.0176224	Spearman correlation	476	LUSC
SQSTM1	ALLOGRAFT REJECTION	-0.106716	0.95	-0.197286	-0.0143391	1.98932e+07	0.0244304	Spearman correlation	476	LUSC
SQSTM1	ANDROGEN RESPONSE	-0.115805	0.95	-0.206115	-0.0235392	2.00565e+07	0.0144632	Spearman correlation	476	LUSC
SQSTM1	ANGIOGENESIS	-0.227241	0.95	-0.313175	-0.137617	2.20596e+07	9.16e-07	Spearman correlation	476	LUSC
SQSTM1	APICAL JUNCTION	-0.217947	0.95	-0.304328	-0.12801	2.18925e+07	2.61e-06	Spearman correlation	476	LUSC
SQSTM1	APICAL SURFACE	-0.165447	0.95	-0.254076	-0.0740623	2.09488e+07	0.000420825	Spearman correlation	476	LUSC
SQSTM1	BILE ACID METABOLISM	-0.194649	0.95	-0.282087	-0.104003	2.14737e+07	2.97e-05	Spearman correlation	476	LUSC
SQSTM1	CHOLESTEROL HOMEOSTASIS	0.225008	0.95	0.135307	0.311051	1.39304e+07	1.18e-06	Spearman correlation	476	LUSC
SQSTM1	COAGULATION	-0.148697	0.95	-0.237941	-0.0569622	2.06478e+07	0.00157667	Spearman correlation	476	LUSC
SQSTM1	COMPLEMENT	-0.103198	0.95	-0.193865	-0.0107827	1.98299e+07	0.0296491	Spearman correlation	476	LUSC
SQSTM1	DNA REPAIR	0.203595	0.95	0.113209	0.290638	1.43153e+07	1.21e-05	Spearman correlation	476	LUSC
SQSTM1	E2F TARGETS	0.100212	0.95	0.00776616	0.19096	1.61736e+07	0.0348791	Spearman correlation	476	LUSC
SQSTM1	EPITHELIAL MESENCHYMAL TRANSITION	-0.195839	0.95	-0.283225	-0.105227	2.14951e+07	2.64e-05	Spearman correlation	476	LUSC
SQSTM1	FATTY ACID METABOLISM	0.101682	0.95	0.00925112	0.19239	1.61472e+07	0.0321845	Spearman correlation	476	LUSC
SQSTM1	GLYCOLYSIS	0.226608	0.95	0.136962	0.312573	1.39017e+07	9.84e-07	Spearman correlation	476	LUSC
SQSTM1	HEDGEHOG SIGNALING	-0.142832	0.95	-0.232281	-0.0509881	2.05424e+07	0.00244008	Spearman correlation	476	LUSC
SQSTM1	HEME METABOLISM	-0.164736	0.95	-0.253392	-0.0733353	2.09361e+07	0.000446276	Spearman correlation	476	LUSC
SQSTM1	IL2 STAT5 SIGNALING	-0.145014	0.95	-0.234387	-0.0532097	2.05816e+07	0.00208464	Spearman correlation	476	LUSC
SQSTM1	IL6 JAK STAT3 SIGNALING	-0.10529	0.95	-0.1959	-0.0128973	1.98675e+07	0.0264688	Spearman correlation	476	LUSC
SQSTM1	KRAS SIGNALING DN	-0.355607	0.95	-0.433851	-0.272039	2.4367e+07	3.06e-15	Spearman correlation	476	LUSC
SQSTM1	KRAS SIGNALING UP	-0.201227	0.95	-0.288377	-0.110771	2.1592e+07	1.54e-05	Spearman correlation	476	LUSC
SQSTM1	MTORC1 SIGNALING	0.409242	0.95	0.329187	0.483455	1.06189e+07	3.47e-20	Spearman correlation	476	LUSC
SQSTM1	MYC TARGETS V1	0.200408	0.95	0.109928	0.287594	1.43726e+07	1.67e-05	Spearman correlation	476	LUSC
SQSTM1	MYC TARGETS V2	0.273011	0.95	0.18517	0.356524	1.30676e+07	2.71e-09	Spearman correlation	476	LUSC
SQSTM1	MYOGENESIS	-0.320554	0.95	-0.401174	-0.235005	2.37369e+07	1.7e-12	Spearman correlation	476	LUSC
SQSTM1	OXIDATIVE PHOSPHORYLATION	0.281951	0.95	0.194506	0.364949	1.29069e+07	7.48e-10	Spearman correlation	476	LUSC
SQSTM1	P53 PATHWAY	0.13633	0.95	0.0443712	0.225997	1.55244e+07	0.00383845	Spearman correlation	476	LUSC
SQSTM1	PANCREAS BETA CELLS	-0.317274	0.95	-0.398106	-0.231552	2.36779e+07	2.94e-12	Spearman correlation	476	LUSC
SQSTM1	REACTIVE OXYGEN SPECIES PATHWAY	0.461112	0.95	0.38502	0.530978	9.68648e+06	7.13e-26	Spearman correlation	476	LUSC
SQSTM1	SPERMATOGENESIS	-0.308013	0.95	-0.389434	-0.221816	2.35115e+07	1.36e-11	Spearman correlation	476	LUSC
SQSTM1	TGF BETA SIGNALING	-0.172179	0.95	-0.260547	-0.0809505	2.10699e+07	0.000237359	Spearman correlation	476	LUSC
SQSTM1	UNFOLDED PROTEIN RESPONSE	0.343392	0.95	0.259106	0.422488	1.18025e+07	3.01e-14	Spearman correlation	476	LUSC
SQSTM1	UV RESPONSE DN	-0.240808	0.95	-0.326061	-0.151669	2.23035e+07	1.85e-07	Spearman correlation	476	LUSC
SQSTM1	WNT BETA CATENIN SIGNALING	-0.214115	0.95	-0.300677	-0.124055	2.18237e+07	3.96e-06	Spearman correlation	476	LUSC
SQSTM1	HEDGEHOG SIGNALING	-0.293717	0.95	-0.497182	-0.0596308	80464	0.0320044	Spearman correlation	72	MESO
SQSTM1	KRAS SIGNALING DN	-0.380475	0.95	-0.567306	-0.156393	85860	0.00355151	Spearman correlation	72	MESO
SQSTM1	MYOGENESIS	-0.423854	0.95	-0.601381	-0.206443	88558	0.000923611	Spearman correlation	72	MESO
SQSTM1	PANCREAS BETA CELLS	-0.421796	0.95	-0.599779	-0.204042	88430	0.000988615	Spearman correlation	72	MESO
SQSTM1	SPERMATOGENESIS	-0.303267	0.95	-0.505034	-0.0700713	81058	0.0260136	Spearman correlation	72	MESO
SQSTM1	TGF BETA SIGNALING	-0.29883	0.95	-0.50139	-0.0652138	80782	0.0288687	Spearman correlation	72	MESO
SQSTM1	WNT BETA CATENIN SIGNALING	-0.372532	0.95	-0.560997	-0.147352	85366	0.00447489	Spearman correlation	72	MESO
SQSTM1	ADIPOGENESIS	0.348905	0.95	0.23321	0.45486	1841984	2.5e-08	Spearman correlation	257	OV
SQSTM1	ALLOGRAFT REJECTION	0.264599	0.95	0.143437	0.377947	2080490	3.47e-05	Spearman correlation	257	OV
SQSTM1	APICAL JUNCTION	-0.188743	0.95	-0.307379	-0.0643296	3363020	0.00373934	Spearman correlation	257	OV
SQSTM1	APICAL SURFACE	-0.166009	0.95	-0.285973	-0.0409226	3298706	0.0113236	Spearman correlation	257	OV
SQSTM1	APOPTOSIS	0.234935	0.95	0.112316	0.350506	2164412	0.000262203	Spearman correlation	257	OV
SQSTM1	CHOLESTEROL HOMEOSTASIS	0.342897	0.95	0.226746	0.44943	1858982	4.5e-08	Spearman correlation	257	OV
SQSTM1	COMPLEMENT	0.258512	0.95	0.137031	0.372333	2097710	5.31e-05	Spearman correlation	257	OV
SQSTM1	DNA REPAIR	0.285175	0.95	0.165165	0.396864	2022280	7.27e-06	Spearman correlation	257	OV
SQSTM1	FATTY ACID METABOLISM	0.305994	0.95	0.187268	0.415908	1963382	1.33e-06	Spearman correlation	257	OV
SQSTM1	G2M CHECKPOINT	-0.135831	0.95	-0.257371	-0.0100609	3213330	0.0398996	Spearman correlation	257	OV
SQSTM1	HEDGEHOG SIGNALING	-0.444898	0.95	-0.540552	-0.337887	4087696	2.72e-13	Spearman correlation	257	OV
SQSTM1	IL6 JAK STAT3 SIGNALING	0.220869	0.95	0.0976431	0.337426	2204204	0.000627256	Spearman correlation	257	OV
SQSTM1	INFLAMMATORY RESPONSE	0.178821	0.95	0.0540974	0.298051	2323160	0.00614302	Spearman correlation	257	OV
SQSTM1	INTERFERON ALPHA RESPONSE	0.310217	0.95	0.191766	0.419759	1951436	9.23e-07	Spearman correlation	257	OV
SQSTM1	INTERFERON GAMMA RESPONSE	0.342116	0.95	0.225907	0.448724	1861192	4.82e-08	Spearman correlation	257	OV
SQSTM1	KRAS SIGNALING DN	-0.369175	0.95	-0.47312	-0.255093	3873472	3.08e-09	Spearman correlation	257	OV
SQSTM1	MITOTIC SPINDLE	-0.368715	0.95	-0.472707	-0.254595	3872172	3.24e-09	Spearman correlation	257	OV
SQSTM1	MTORC1 SIGNALING	0.190852	0.95	0.0665078	0.309358	2289126	0.0033527	Spearman correlation	257	OV
SQSTM1	MYC TARGETS V1	0.186635	0.95	0.0621539	0.305399	2301054	0.0041553	Spearman correlation	257	OV
SQSTM1	MYC TARGETS V2	0.151662	0.95	0.0262203	0.272401	2399996	0.0210634	Spearman correlation	257	OV
SQSTM1	MYOGENESIS	-0.156444	0.95	-0.27693	-0.031115	3271646	0.017254	Spearman correlation	257	OV
SQSTM1	NOTCH SIGNALING	-0.288923	0.95	-0.4003	-0.169135	3646436	5.41e-06	Spearman correlation	257	OV
SQSTM1	OXIDATIVE PHOSPHORYLATION	0.445053	0.95	0.338059	0.540689	1569976	2.67e-13	Spearman correlation	257	OV
SQSTM1	P53 PATHWAY	0.274059	0.95	0.153412	0.386656	2053728	1.71e-05	Spearman correlation	257	OV
SQSTM1	PANCREAS BETA CELLS	-0.262219	0.95	-0.375752	-0.140931	3570888	4.11e-05	Spearman correlation	257	OV
SQSTM1	REACTIVE OXYGEN SPECIES PATHWAY	0.55687	0.95	0.463429	0.638063	1253640	1.99e-21	Spearman correlation	257	OV
SQSTM1	SPERMATOGENESIS	-0.299094	0.95	-0.409607	-0.179929	3675210	2.36e-06	Spearman correlation	257	OV
SQSTM1	TGF BETA SIGNALING	-0.2142	0.95	-0.331208	-0.0907046	3435040	0.000921188	Spearman correlation	257	OV
SQSTM1	TNFA SIGNALING VIA NFKB	0.248784	0.95	0.126815	0.363342	2125232	0.000103955	Spearman correlation	257	OV
SQSTM1	UNFOLDED PROTEIN RESPONSE	0.134562	0.95	0.00876838	0.256163	2448372	0.0419303	Spearman correlation	257	OV
SQSTM1	UV RESPONSE DN	-0.194878	0.95	-0.313135	-0.0706698	3380376	0.00271153	Spearman correlation	257	OV
SQSTM1	UV RESPONSE UP	0.284665	0.95	0.164624	0.396396	2023724	7.54e-06	Spearman correlation	257	OV
SQSTM1	WNT BETA CATENIN SIGNALING	-0.433721	0.95	-0.530676	-0.325562	4056076	1.24e-12	Spearman correlation	257	OV
SQSTM1	XENOBIOTIC METABOLISM	0.154017	0.95	0.0286297	0.274632	2393334	0.019087	Spearman correlation	257	OV
SQSTM1	ALLOGRAFT REJECTION	-0.244505	0.95	-0.398055	-0.0776282	581408	0.00627246	Spearman correlation	141	PAAD
SQSTM1	ANDROGEN RESPONSE	-0.196892	0.95	-0.355104	-0.0277144	559164	0.0302707	Spearman correlation	141	PAAD
SQSTM1	ANGIOGENESIS	-0.356912	0.95	-0.496852	-0.19888	633922	3.87e-05	Spearman correlation	141	PAAD
SQSTM1	APICAL JUNCTION	-0.239235	0.95	-0.393334	-0.0720622	578946	0.00752939	Spearman correlation	141	PAAD
SQSTM1	APICAL SURFACE	-0.417805	0.95	-0.5489	-0.26665	662370	8.87e-07	Spearman correlation	141	PAAD
SQSTM1	BILE ACID METABOLISM	-0.386519	0.95	-0.522285	-0.231644	647754	6.88e-06	Spearman correlation	141	PAAD
SQSTM1	CHOLESTEROL HOMEOSTASIS	0.197684	0.95	0.0285378	0.355824	374826	0.0295739	Spearman correlation	141	PAAD
SQSTM1	COMPLEMENT	-0.237056	0.95	-0.39138	-0.0697638	577928	0.00813373	Spearman correlation	141	PAAD
SQSTM1	DNA REPAIR	0.375902	0.95	0.219855	0.513193	291566	1.3e-05	Spearman correlation	141	PAAD
SQSTM1	E2F TARGETS	0.303091	0.95	0.140214	0.449996	325582	0.000571114	Spearman correlation	141	PAAD
SQSTM1	EPITHELIAL MESENCHYMAL TRANSITION	-0.199135	0.95	-0.357143	-0.0300473	560212	0.0283089	Spearman correlation	141	PAAD
SQSTM1	G2M CHECKPOINT	0.24844	0.95	0.0817903	0.401574	351114	0.00539971	Spearman correlation	141	PAAD
SQSTM1	GLYCOLYSIS	0.25832	0.95	0.0922688	0.410393	346498	0.00375151	Spearman correlation	141	PAAD
SQSTM1	HEDGEHOG SIGNALING	-0.539689	0.95	-0.650112	-0.406942	719312	3.62e-11	Spearman correlation	141	PAAD
SQSTM1	HEME METABOLISM	-0.343315	0.95	-0.485092	-0.183952	627570	7.89e-05	Spearman correlation	141	PAAD
SQSTM1	IL2 STAT5 SIGNALING	-0.315947	0.95	-0.461262	-0.154124	614784	0.000313788	Spearman correlation	141	PAAD
SQSTM1	IL6 JAK STAT3 SIGNALING	-0.25314	0.95	-0.405773	-0.0867707	585442	0.00455308	Spearman correlation	141	PAAD
SQSTM1	INFLAMMATORY RESPONSE	-0.281887	0.95	-0.431311	-0.117411	598872	0.00146118	Spearman correlation	141	PAAD
SQSTM1	INTERFERON GAMMA RESPONSE	-0.197115	0.95	-0.355307	-0.0279458	559268	0.0300897	Spearman correlation	141	PAAD
SQSTM1	KRAS SIGNALING DN	-0.493005	0.95	-0.611803	-0.352457	697502	2.78e-09	Spearman correlation	141	PAAD
SQSTM1	KRAS SIGNALING UP	-0.394679	0.95	-0.529252	-0.240735	651566	4.14e-06	Spearman correlation	141	PAAD
SQSTM1	MTORC1 SIGNALING	0.326011	0.95	0.165059	0.47005	314874	0.000194875	Spearman correlation	141	PAAD
SQSTM1	MYC TARGETS V1	0.354784	0.95	0.19654	0.495015	301432	4.34e-05	Spearman correlation	141	PAAD
SQSTM1	MYC TARGETS V2	0.445126	0.95	0.29755	0.571926	259226	1.3e-07	Spearman correlation	141	PAAD
SQSTM1	MYOGENESIS	-0.319213	0.95	-0.464117	-0.157669	616310	0.000269265	Spearman correlation	141	PAAD
SQSTM1	OXIDATIVE PHOSPHORYLATION	0.246954	0.95	0.0802181	0.400246	351808	0.00570656	Spearman correlation	141	PAAD
SQSTM1	PANCREAS BETA CELLS	-0.35067	0.95	-0.49146	-0.192018	631006	5.39e-05	Spearman correlation	141	PAAD
SQSTM1	PEROXISOME	-0.202153	0.95	-0.359884	-0.0331888	561622	0.0258172	Spearman correlation	141	PAAD
SQSTM1	SPERMATOGENESIS	-0.428379	0.95	-0.557835	-0.278572	667310	4.24e-07	Spearman correlation	141	PAAD
SQSTM1	TGF BETA SIGNALING	-0.243088	0.95	-0.396787	-0.0761306	580746	0.00660521	Spearman correlation	141	PAAD
SQSTM1	UNFOLDED PROTEIN RESPONSE	0.385055	0.95	0.230015	0.521033	287290	7.49e-06	Spearman correlation	141	PAAD
SQSTM1	UV RESPONSE DN	-0.334685	0.95	-0.4776	-0.174514	623538	0.000125078	Spearman correlation	141	PAAD
SQSTM1	WNT BETA CATENIN SIGNALING	-0.250773	0.95	-0.403659	-0.0842613	584336	0.00498524	Spearman correlation	141	PAAD
SQSTM1	ADIPOGENESIS	-0.174679	0.95	-0.32667	-0.01388	757616	0.0373687	Spearman correlation	157	PCPG
SQSTM1	ANGIOGENESIS	-0.323641	0.95	-0.460792	-0.171392	853690	6.39e-05	Spearman correlation	157	PCPG
SQSTM1	APICAL JUNCTION	-0.472575	0.95	-0.588905	-0.337061	949746	1.06e-09	Spearman correlation	157	PCPG
SQSTM1	APICAL SURFACE	-0.419173	0.95	-0.543631	-0.276677	915304	1.05e-07	Spearman correlation	157	PCPG
SQSTM1	COAGULATION	-0.268713	0.95	-0.412055	-0.112392	818264	0.00106012	Spearman correlation	157	PCPG
SQSTM1	COMPLEMENT	-0.192652	0.95	-0.343184	-0.0324709	769208	0.0211514	Spearman correlation	157	PCPG
SQSTM1	DNA REPAIR	0.260074	0.95	0.103211	0.404314	477220	0.00155886	Spearman correlation	157	PCPG
SQSTM1	E2F TARGETS	0.195877	0.95	0.0358185	0.346138	518624	0.0189803	Spearman correlation	157	PCPG
SQSTM1	EPITHELIAL MESENCHYMAL TRANSITION	-0.246708	0.95	-0.392297	-0.0890606	804072	0.00276722	Spearman correlation	157	PCPG
SQSTM1	ESTROGEN RESPONSE EARLY	-0.288137	0.95	-0.429384	-0.133131	830792	0.00042352	Spearman correlation	157	PCPG
SQSTM1	ESTROGEN RESPONSE LATE	-0.264719	0.95	-0.408478	-0.108144	815688	0.00126402	Spearman correlation	157	PCPG
SQSTM1	FATTY ACID METABOLISM	-0.216985	0.95	-0.365395	-0.0578182	784902	0.00893111	Spearman correlation	157	PCPG
SQSTM1	G2M CHECKPOINT	0.179398	0.95	0.0187512	0.331016	529252	0.0324911	Spearman correlation	157	PCPG
SQSTM1	GLYCOLYSIS	-0.258343	0.95	-0.402761	-0.101375	811576	0.0016749	Spearman correlation	157	PCPG
SQSTM1	HEDGEHOG SIGNALING	-0.287542	0.95	-0.428855	-0.132494	830408	0.000434479	Spearman correlation	157	PCPG
SQSTM1	HYPOXIA	-0.278053	0.95	-0.4204	-0.122347	824288	0.00068712	Spearman correlation	157	PCPG
SQSTM1	IL2 STAT5 SIGNALING	-0.166387	0.95	-0.31902	-0.00534042	752268	0.0476257	Spearman correlation	157	PCPG
SQSTM1	KRAS SIGNALING DN	-0.270034	0.95	-0.413236	-0.113798	819116	0.000998387	Spearman correlation	157	PCPG
SQSTM1	KRAS SIGNALING UP	-0.184214	0.95	-0.335443	-0.0237294	763766	0.027833	Spearman correlation	157	PCPG
SQSTM1	MYOGENESIS	-0.364915	0.95	-0.496878	-0.216458	880310	5.24e-06	Spearman correlation	157	PCPG
SQSTM1	NOTCH SIGNALING	-0.361039	0.95	-0.493508	-0.212198	877810	6.78e-06	Spearman correlation	157	PCPG
SQSTM1	OXIDATIVE PHOSPHORYLATION	0.241117	0.95	0.0831599	0.387256	489446	0.00349977	Spearman correlation	157	PCPG
SQSTM1	PANCREAS BETA CELLS	-0.219432	0.95	-0.367619	-0.0603783	786480	0.00818478	Spearman correlation	157	PCPG
SQSTM1	PI3K AKT MTOR SIGNALING	-0.221531	0.95	-0.369526	-0.0625766	787834	0.00757288	Spearman correlation	157	PCPG
SQSTM1	PROTEIN SECRETION	0.174567	0.95	0.0137649	0.326567	532368	0.0374654	Spearman correlation	157	PCPG
SQSTM1	TGF BETA SIGNALING	-0.246504	0.95	-0.392113	-0.0888444	803940	0.00278905	Spearman correlation	157	PCPG
SQSTM1	UNFOLDED PROTEIN RESPONSE	0.206275	0.95	0.0466358	0.355639	511918	0.0131707	Spearman correlation	157	PCPG
SQSTM1	UV RESPONSE DN	-0.279002	0.95	-0.421247	-0.12336	824900	0.000657833	Spearman correlation	157	PCPG
SQSTM1	WNT BETA CATENIN SIGNALING	-0.359535	0.95	-0.492199	-0.210547	876840	7.44e-06	Spearman correlation	157	PCPG
SQSTM1	XENOBIOTIC METABOLISM	-0.237517	0.95	-0.384005	-0.0793662	798144	0.00405562	Spearman correlation	157	PCPG
SQSTM1	ALLOGRAFT REJECTION	-0.287295	0.95	-0.371726	-0.198149	20343196	7.49e-10	Spearman correlation	456	PRAD
SQSTM1	ANGIOGENESIS	-0.305063	0.95	-0.38839	-0.216788	20623988	5.49e-11	Spearman correlation	456	PRAD
SQSTM1	APICAL JUNCTION	-0.394587	0.95	-0.471526	-0.311686	22038738	4.8e-18	Spearman correlation	456	PRAD
SQSTM1	APICAL SURFACE	-0.356357	0.95	-0.43619	-0.270958	21434594	9.53e-15	Spearman correlation	456	PRAD
SQSTM1	APOPTOSIS	-0.222211	0.95	-0.310222	-0.130424	19314678	2.52e-06	Spearman correlation	456	PRAD
SQSTM1	BILE ACID METABOLISM	-0.10849	0.95	-0.200955	-0.0141078	17517528	0.0249049	Spearman correlation	456	PRAD
SQSTM1	CHOLESTEROL HOMEOSTASIS	0.146735	0.95	0.0529433	0.237961	13484192	0.00219779	Spearman correlation	456	PRAD
SQSTM1	COAGULATION	-0.240842	0.95	-0.327903	-0.149724	19609094	3.12e-07	Spearman correlation	456	PRAD
SQSTM1	COMPLEMENT	-0.289948	0.95	-0.374218	-0.200928	20385120	5.11e-10	Spearman correlation	456	PRAD
SQSTM1	DNA REPAIR	0.324796	0.95	0.237563	0.406832	10670296	2.37e-12	Spearman correlation	456	PRAD
SQSTM1	E2F TARGETS	0.113686	0.95	0.0193681	0.205999	14006466	0.0186029	Spearman correlation	456	PRAD
SQSTM1	EPITHELIAL MESENCHYMAL TRANSITION	-0.290255	0.95	-0.374506	-0.201251	20389982	4.9e-10	Spearman correlation	456	PRAD
SQSTM1	ESTROGEN RESPONSE EARLY	-0.223508	0.95	-0.311455	-0.131766	19335178	2.19e-06	Spearman correlation	456	PRAD
SQSTM1	ESTROGEN RESPONSE LATE	-0.200896	0.95	-0.289917	-0.108429	18977838	2.24e-05	Spearman correlation	456	PRAD
SQSTM1	HEDGEHOG SIGNALING	-0.249053	0.95	-0.335677	-0.158252	19738862	1.16e-07	Spearman correlation	456	PRAD
SQSTM1	HEME METABOLISM	-0.294343	0.95	-0.378343	-0.205536	20454586	2.72e-10	Spearman correlation	456	PRAD
SQSTM1	HYPOXIA	-0.20423	0.95	-0.293098	-0.111863	19030512	1.62e-05	Spearman correlation	456	PRAD
SQSTM1	IL2 STAT5 SIGNALING	-0.256319	0.95	-0.342546	-0.16581	19853686	4.8e-08	Spearman correlation	456	PRAD
SQSTM1	IL6 JAK STAT3 SIGNALING	-0.245887	0.95	-0.332681	-0.154962	19688826	1.71e-07	Spearman correlation	456	PRAD
SQSTM1	INFLAMMATORY RESPONSE	-0.271326	0.95	-0.356704	-0.181453	20090838	6.85e-09	Spearman correlation	456	PRAD
SQSTM1	INTERFERON ALPHA RESPONSE	-0.106983	0.95	-0.199492	-0.0125835	17493714	0.0268583	Spearman correlation	456	PRAD
SQSTM1	INTERFERON GAMMA RESPONSE	-0.192281	0.95	-0.281688	-0.0995644	18841692	5.1e-05	Spearman correlation	456	PRAD
SQSTM1	KRAS SIGNALING DN	-0.42439	0.95	-0.498903	-0.34365	22509726	6.37e-21	Spearman correlation	456	PRAD
SQSTM1	KRAS SIGNALING UP	-0.302616	0.95	-0.386098	-0.214217	20585312	7.96e-11	Spearman correlation	456	PRAD
SQSTM1	MITOTIC SPINDLE	-0.218312	0.95	-0.306513	-0.126393	19253050	3.81e-06	Spearman correlation	456	PRAD
SQSTM1	MTORC1 SIGNALING	0.254441	0.95	0.163856	0.340772	11782110	6.02e-08	Spearman correlation	456	PRAD
SQSTM1	MYC TARGETS V1	0.348465	0.95	0.262588	0.428865	10296248	4.04e-14	Spearman correlation	456	PRAD
SQSTM1	MYC TARGETS V2	0.318126	0.95	0.230532	0.400606	10775692	7.06e-12	Spearman correlation	456	PRAD
SQSTM1	MYOGENESIS	-0.224258	0.95	-0.312167	-0.132541	19347024	2.02e-06	Spearman correlation	456	PRAD
SQSTM1	NOTCH SIGNALING	-0.291408	0.95	-0.375589	-0.202459	20408206	4.14e-10	Spearman correlation	456	PRAD
SQSTM1	OXIDATIVE PHOSPHORYLATION	0.360922	0.95	0.275805	0.440423	10099384	4.05e-15	Spearman correlation	456	PRAD
SQSTM1	P53 PATHWAY	-0.182265	0.95	-0.272103	-0.0892764	18683400	0.000126914	Spearman correlation	456	PRAD
SQSTM1	PANCREAS BETA CELLS	-0.104451	0.95	-0.197032	-0.0100238	17453710	0.0307597	Spearman correlation	456	PRAD
SQSTM1	REACTIVE OXYGEN SPECIES PATHWAY	0.130063	0.95	0.0359788	0.221862	13747668	0.00680178	Spearman correlation	456	PRAD
SQSTM1	SPERMATOGENESIS	-0.279626	0.95	-0.364518	-0.190125	20222012	2.22e-09	Spearman correlation	456	PRAD
SQSTM1	TGF BETA SIGNALING	-0.267748	0.95	-0.353332	-0.17772	20034298	1.1e-08	Spearman correlation	456	PRAD
SQSTM1	TNFA SIGNALING VIA NFKB	-0.178401	0.95	-0.268402	-0.0853135	18622346	0.000177648	Spearman correlation	456	PRAD
SQSTM1	UNFOLDED PROTEIN RESPONSE	0.322432	0.95	0.235071	0.404627	10707640	3.5e-12	Spearman correlation	456	PRAD
SQSTM1	UV RESPONSE DN	-0.371359	0.95	-0.450086	-0.286904	21671676	5.44e-16	Spearman correlation	456	PRAD
SQSTM1	WNT BETA CATENIN SIGNALING	-0.383958	0.95	-0.461727	-0.300332	21870776	4.38e-17	Spearman correlation	456	PRAD
SQSTM1	XENOBIOTIC METABOLISM	-0.167754	0.95	-0.258187	-0.0744077	18454090	0.000435509	Spearman correlation	456	PRAD
SQSTM1	ADIPOGENESIS	-0.272456	0.95	-0.435019	-0.0926929	366442	0.00471628	Spearman correlation	120	READ
SQSTM1	ALLOGRAFT REJECTION	-0.380575	0.95	-0.527942	-0.210961	397578	4.72e-05	Spearman correlation	120	READ
SQSTM1	ANDROGEN RESPONSE	-0.587089	0.95	-0.696138	-0.451559	457050	1.37e-11	Spearman correlation	120	READ
SQSTM1	ANGIOGENESIS	-0.439267	0.95	-0.576949	-0.277311	414480	1.73e-06	Spearman correlation	120	READ
SQSTM1	APICAL JUNCTION	-0.358928	0.95	-0.509615	-0.186877	391344	0.000136661	Spearman correlation	120	READ
SQSTM1	APICAL SURFACE	-0.305007	0.95	-0.463364	-0.127774	375816	0.00143684	Spearman correlation	120	READ
SQSTM1	APOPTOSIS	-0.386492	0.95	-0.532928	-0.21758	399282	3.45e-05	Spearman correlation	120	READ
SQSTM1	COAGULATION	-0.340253	0.95	-0.493695	-0.166265	385966	0.00032457	Spearman correlation	120	READ
SQSTM1	COMPLEMENT	-0.422849	0.95	-0.563339	-0.258594	409752	4.62e-06	Spearman correlation	120	READ
SQSTM1	DNA REPAIR	0.294764	0.95	0.116686	0.454479	203094	0.00213363	Spearman correlation	120	READ
SQSTM1	EPITHELIAL MESENCHYMAL TRANSITION	-0.403327	0.95	-0.547057	-0.236497	404130	1.4e-05	Spearman correlation	120	READ
SQSTM1	ESTROGEN RESPONSE EARLY	-0.268845	0.95	-0.431854	-0.0888282	365402	0.00536368	Spearman correlation	120	READ
SQSTM1	HEDGEHOG SIGNALING	-0.352281	0.95	-0.503961	-0.179524	389430	0.000186655	Spearman correlation	120	READ
SQSTM1	HEME METABOLISM	-0.43087	0.95	-0.569998	-0.267723	412062	2.87e-06	Spearman correlation	120	READ
SQSTM1	HYPOXIA	-0.340551	0.95	-0.49395	-0.166593	386052	0.000321661	Spearman correlation	120	READ
SQSTM1	IL2 STAT5 SIGNALING	-0.425849	0.95	-0.565832	-0.262005	410616	3.86e-06	Spearman correlation	120	READ
SQSTM1	IL6 JAK STAT3 SIGNALING	-0.19618	0.95	-0.367312	-0.0122007	344476	0.0463792	Spearman correlation	120	READ
SQSTM1	INFLAMMATORY RESPONSE	-0.404625	0.95	-0.548143	-0.237961	404504	1.3e-05	Spearman correlation	120	READ
SQSTM1	INTERFERON GAMMA RESPONSE	-0.207674	0.95	-0.377632	-0.0241792	347786	0.0342271	Spearman correlation	120	READ
SQSTM1	KRAS SIGNALING DN	-0.546392	0.95	-0.663913	-0.402533	445330	6.26e-10	Spearman correlation	120	READ
SQSTM1	KRAS SIGNALING UP	-0.515668	0.95	-0.639292	-0.366059	436482	7.91e-09	Spearman correlation	120	READ
SQSTM1	MITOTIC SPINDLE	-0.358018	0.95	-0.508842	-0.185869	391082	0.00014235	Spearman correlation	120	READ
SQSTM1	MYC TARGETS V2	0.371449	0.95	0.200783	0.520233	181010	7.49e-05	Spearman correlation	120	READ
SQSTM1	MYOGENESIS	-0.407264	0.95	-0.55035	-0.24094	405264	1.12e-05	Spearman correlation	120	READ
SQSTM1	OXIDATIVE PHOSPHORYLATION	0.3867	0.95	0.217813	0.533103	176618	3.43e-05	Spearman correlation	120	READ
SQSTM1	PI3K AKT MTOR SIGNALING	-0.513383	0.95	-0.637451	-0.363365	435824	9.45e-09	Spearman correlation	120	READ
SQSTM1	PROTEIN SECRETION	-0.571963	0.95	-0.684212	-0.433242	452694	5.8e-11	Spearman correlation	120	READ
SQSTM1	REACTIVE OXYGEN SPECIES PATHWAY	0.3812	0.95	0.211659	0.528469	178202	4.57e-05	Spearman correlation	120	READ
SQSTM1	SPERMATOGENESIS	-0.520508	0.95	-0.643188	-0.371775	437876	5.39e-09	Spearman correlation	120	READ
SQSTM1	TGF BETA SIGNALING	-0.437204	0.95	-0.575243	-0.274952	413886	1.96e-06	Spearman correlation	120	READ
SQSTM1	TNFA SIGNALING VIA NFKB	-0.287652	0.95	-0.448291	-0.109014	370818	0.00276451	Spearman correlation	120	READ
SQSTM1	UV RESPONSE DN	-0.60516	0.95	-0.710308	-0.473594	462254	2.11e-12	Spearman correlation	120	READ
SQSTM1	XENOBIOTIC METABOLISM	-0.201354	0.95	-0.371963	-0.0175863	345966	0.0403917	Spearman correlation	120	READ
SQSTM1	ALLOGRAFT REJECTION	0.184754	0.95	0.0526221	0.310527	1.63168e+06	0.0084487	Spearman correlation	229	SARC
SQSTM1	APICAL JUNCTION	-0.275348	0.95	-0.394291	-0.147332	2.55256e+06	5.7e-05	Spearman correlation	229	SARC
SQSTM1	APICAL SURFACE	-0.3428	0.95	-0.455399	-0.219407	2.68756e+06	3.5e-07	Spearman correlation	229	SARC
SQSTM1	APOPTOSIS	0.209994	0.95	0.0787727	0.334063	1.58116e+06	0.00261559	Spearman correlation	229	SARC
SQSTM1	CHOLESTEROL HOMEOSTASIS	0.184596	0.95	0.0524591	0.31038	1.632e+06	0.0084905	Spearman correlation	229	SARC
SQSTM1	COAGULATION	0.202119	0.95	0.0705941	0.326736	1.59693e+06	0.00387351	Spearman correlation	229	SARC
SQSTM1	COMPLEMENT	0.228843	0.95	0.0984194	0.351538	1.54344e+06	0.000973747	Spearman correlation	229	SARC
SQSTM1	DNA REPAIR	0.261489	0.95	0.13269	0.381604	1.4781e+06	0.000142545	Spearman correlation	229	SARC
SQSTM1	ESTROGEN RESPONSE EARLY	-0.251128	0.95	-0.372089	-0.12178	2.50408e+06	0.000269153	Spearman correlation	229	SARC
SQSTM1	ESTROGEN RESPONSE LATE	-0.204395	0.95	-0.328855	-0.0729563	2.41055e+06	0.00344848	Spearman correlation	229	SARC
SQSTM1	FATTY ACID METABOLISM	0.159384	0.95	0.0265189	0.286715	1.68246e+06	0.0243442	Spearman correlation	229	SARC
SQSTM1	HEDGEHOG SIGNALING	-0.438079	0.95	-0.539946	-0.323563	2.87826e+06	1.92e-11	Spearman correlation	229	SARC
SQSTM1	IL2 STAT5 SIGNALING	0.159224	0.95	0.0263555	0.286565	1.68278e+06	0.0244489	Spearman correlation	229	SARC
SQSTM1	IL6 JAK STAT3 SIGNALING	0.217722	0.95	0.0868154	0.341238	1.5657e+06	0.0017604	Spearman correlation	229	SARC
SQSTM1	INFLAMMATORY RESPONSE	0.1977	0.95	0.0660128	0.322619	1.60577e+06	0.00476779	Spearman correlation	229	SARC
SQSTM1	INTERFERON ALPHA RESPONSE	0.249875	0.95	0.120462	0.370936	1.50135e+06	0.000288929	Spearman correlation	229	SARC
SQSTM1	INTERFERON GAMMA RESPONSE	0.238331	0.95	0.108348	0.360302	1.52445e+06	0.000572011	Spearman correlation	229	SARC
SQSTM1	KRAS SIGNALING DN	-0.487652	0.95	-0.583138	-0.378875	2.97748e+06	2.87e-14	Spearman correlation	229	SARC
SQSTM1	MTORC1 SIGNALING	0.339567	0.95	0.215921	0.452494	1.32183e+06	4.55e-07	Spearman correlation	229	SARC
SQSTM1	MYC TARGETS V1	0.190414	0.95	0.0584703	0.315818	1.62035e+06	0.00665383	Spearman correlation	229	SARC
SQSTM1	MYC TARGETS V2	0.146308	0.95	0.0131354	0.27438	1.70863e+06	0.039515	Spearman correlation	229	SARC
SQSTM1	NOTCH SIGNALING	-0.243849	0.95	-0.365389	-0.114134	2.48951e+06	0.000411507	Spearman correlation	229	SARC
SQSTM1	OXIDATIVE PHOSPHORYLATION	0.222779	0.95	0.0920875	0.345925	1.55558e+06	0.00134125	Spearman correlation	229	SARC
SQSTM1	P53 PATHWAY	0.149989	0.95	0.016898	0.277857	1.70126e+06	0.0345515	Spearman correlation	229	SARC
SQSTM1	PANCREAS BETA CELLS	-0.328097	0.95	-0.442168	-0.20358	2.65813e+06	1.18e-06	Spearman correlation	229	SARC
SQSTM1	PROTEIN SECRETION	0.151548	0.95	0.0184931	0.279328	1.69814e+06	0.0325282	Spearman correlation	229	SARC
SQSTM1	REACTIVE OXYGEN SPECIES PATHWAY	0.326783	0.95	0.202169	0.440984	1.34742e+06	1.31e-06	Spearman correlation	229	SARC
SQSTM1	SPERMATOGENESIS	-0.344496	0.95	-0.456922	-0.221236	2.69095e+06	3.04e-07	Spearman correlation	229	SARC
SQSTM1	TGF BETA SIGNALING	-0.230343	0.95	-0.352925	-0.0999877	2.46248e+06	0.000898958	Spearman correlation	229	SARC
SQSTM1	TNFA SIGNALING VIA NFKB	0.227951	0.95	0.0974875	0.350713	1.54522e+06	0.00101668	Spearman correlation	229	SARC
SQSTM1	UNFOLDED PROTEIN RESPONSE	0.304284	0.95	0.178086	0.420635	1.39245e+06	7.53e-06	Spearman correlation	229	SARC
SQSTM1	WNT BETA CATENIN SIGNALING	-0.454342	0.95	-0.554176	-0.341624	2.91081e+06	2.56e-12	Spearman correlation	229	SARC
SQSTM1	ANDROGEN RESPONSE	-0.477638	0.95	-0.621197	-0.303061	231766	2.85e-06	Spearman correlation	98	SKCM
SQSTM1	ANGIOGENESIS	-0.33786	0.95	-0.507018	-0.143642	209842	0.00162556	Spearman correlation	98	SKCM
SQSTM1	BILE ACID METABOLISM	-0.448183	0.95	-0.597633	-0.268634	227146	1.39e-05	Spearman correlation	98	SKCM
SQSTM1	COAGULATION	-0.227359	0.95	-0.412347	-0.0243649	192510	0.0392131	Spearman correlation	98	SKCM
SQSTM1	DNA REPAIR	0.54861	0.95	0.387928	0.676929	70800	3.23e-08	Spearman correlation	98	SKCM
SQSTM1	HEME METABOLISM	-0.250056	0.95	-0.432124	-0.0484016	196070	0.0227972	Spearman correlation	98	SKCM
SQSTM1	INFLAMMATORY RESPONSE	-0.240518	0.95	-0.423834	-0.0382723	194574	0.0288726	Spearman correlation	98	SKCM
SQSTM1	KRAS SIGNALING UP	-0.376878	0.95	-0.539499	-0.187151	215962	0.000371219	Spearman correlation	98	SKCM
SQSTM1	MITOTIC SPINDLE	-0.268851	0.95	-0.44837	-0.0684846	199018	0.0137142	Spearman correlation	98	SKCM
SQSTM1	MYC TARGETS V2	0.52483	0.95	0.359185	0.658418	74530	1.66e-07	Spearman correlation	98	SKCM
SQSTM1	OXIDATIVE PHOSPHORYLATION	0.353863	0.95	0.161396	0.520398	101346	0.000902007	Spearman correlation	98	SKCM
SQSTM1	PEROXISOME	-0.224056	0.95	-0.409454	-0.0208868	191992	0.0422592	Spearman correlation	98	SKCM
SQSTM1	PROTEIN SECRETION	-0.460959	0.95	-0.607886	-0.283511	229150	7.06e-06	Spearman correlation	98	SKCM
SQSTM1	REACTIVE OXYGEN SPECIES PATHWAY	0.357905	0.95	0.1659	0.523765	100712	0.000773365	Spearman correlation	98	SKCM
SQSTM1	SPERMATOGENESIS	-0.330337	0.95	-0.500699	-0.135338	208662	0.00210647	Spearman correlation	98	SKCM
SQSTM1	TGF BETA SIGNALING	-0.342552	0.95	-0.51095	-0.148835	210578	0.00136891	Spearman correlation	98	SKCM
SQSTM1	UV RESPONSE DN	-0.474246	0.95	-0.618497	-0.299073	231234	3.41e-06	Spearman correlation	98	SKCM
SQSTM1	ADIPOGENESIS	0.187581	0.95	0.0794115	0.291385	5228474	0.00085256	Spearman correlation	338	STAD
SQSTM1	ANDROGEN RESPONSE	-0.270726	0.95	-0.369546	-0.165851	8177998	9.02e-07	Spearman correlation	338	STAD
SQSTM1	APICAL JUNCTION	-0.205764	0.95	-0.308597	-0.098177	7759924	0.000240317	Spearman correlation	338	STAD
SQSTM1	APICAL SURFACE	-0.221696	0.95	-0.323623	-0.114682	7862456	7.01e-05	Spearman correlation	338	STAD
SQSTM1	APOPTOSIS	0.177814	0.95	0.0693624	0.282111	5291336	0.00161782	Spearman correlation	338	STAD
SQSTM1	BILE ACID METABOLISM	-0.192761	0.95	-0.296295	-0.0847499	7676242	0.000595745	Spearman correlation	338	STAD
SQSTM1	CHOLESTEROL HOMEOSTASIS	0.183874	0.95	0.075595	0.287867	5252332	0.00109138	Spearman correlation	338	STAD
SQSTM1	DNA REPAIR	0.418534	0.95	0.3236	0.505125	3742134	3.43e-15	Spearman correlation	338	STAD
SQSTM1	E2F TARGETS	0.202707	0.95	0.0950161	0.305708	5131132	0.000299106	Spearman correlation	338	STAD
SQSTM1	EPITHELIAL MESENCHYMAL TRANSITION	-0.136379	0.95	-0.242552	-0.0269772	7313380	0.0168724	Spearman correlation	338	STAD
SQSTM1	FATTY ACID METABOLISM	0.191607	0.95	0.0835599	0.295202	5202564	0.000643795	Spearman correlation	338	STAD
SQSTM1	G2M CHECKPOINT	0.114397	0.95	0.00464955	0.221421	5699468	0.0468946	Spearman correlation	338	STAD
SQSTM1	GLYCOLYSIS	0.284393	0.95	0.180215	0.382261	4605426	2.29e-07	Spearman correlation	338	STAD
SQSTM1	HEDGEHOG SIGNALING	-0.318544	0.95	-0.413873	-0.216304	8485738	5.17e-09	Spearman correlation	338	STAD
SQSTM1	IL6 JAK STAT3 SIGNALING	0.114241	0.95	0.00449148	0.22127	5700472	0.0471642	Spearman correlation	338	STAD
SQSTM1	INTERFERON ALPHA RESPONSE	0.19785	0.95	0.0899998	0.301114	5162388	0.000421686	Spearman correlation	338	STAD
SQSTM1	INTERFERON GAMMA RESPONSE	0.149686	0.95	0.0405467	0.255295	5472358	0.00843463	Spearman correlation	338	STAD
SQSTM1	KRAS SIGNALING DN	-0.274687	0.95	-0.373234	-0.170009	8203486	6.08e-07	Spearman correlation	338	STAD
SQSTM1	KRAS SIGNALING UP	-0.139818	0.95	-0.245849	-0.0304805	7335514	0.0142245	Spearman correlation	338	STAD
SQSTM1	MITOTIC SPINDLE	-0.204384	0.95	-0.307294	-0.0967503	7751044	0.000265192	Spearman correlation	338	STAD
SQSTM1	MTORC1 SIGNALING	0.341254	0.95	0.240459	0.434768	4239486	3.11e-10	Spearman correlation	338	STAD
SQSTM1	MYC TARGETS V1	0.318105	0.95	0.215839	0.413468	4388464	5.43e-09	Spearman correlation	338	STAD
SQSTM1	MYC TARGETS V2	0.397293	0.95	0.300602	0.485901	3878832	1.08e-13	Spearman correlation	338	STAD
SQSTM1	MYOGENESIS	-0.285374	0.95	-0.383172	-0.181248	8272266	2.06e-07	Spearman correlation	338	STAD
SQSTM1	OXIDATIVE PHOSPHORYLATION	0.409299	0.95	0.313587	0.496778	3801568	1.59e-14	Spearman correlation	338	STAD
SQSTM1	P53 PATHWAY	0.42057	0.95	0.325811	0.506963	3729032	2.43e-15	Spearman correlation	338	STAD
SQSTM1	PANCREAS BETA CELLS	-0.322496	0.95	-0.417516	-0.220499	8511172	3.22e-09	Spearman correlation	338	STAD
SQSTM1	PROTEIN SECRETION	-0.173972	0.95	-0.278458	-0.0654161	7555318	0.00205844	Spearman correlation	338	STAD
SQSTM1	REACTIVE OXYGEN SPECIES PATHWAY	0.524353	0.95	0.439874	0.599634	3061114	1.9e-24	Spearman correlation	338	STAD
SQSTM1	SPERMATOGENESIS	-0.286859	0.95	-0.384552	-0.182812	8281826	1.77e-07	Spearman correlation	338	STAD
SQSTM1	TGF BETA SIGNALING	-0.224896	0.95	-0.326636	-0.118005	7883052	5.41e-05	Spearman correlation	338	STAD
SQSTM1	TNFA SIGNALING VIA NFKB	0.186922	0.95	0.0787324	0.290759	5232718	0.000890506	Spearman correlation	338	STAD
SQSTM1	UNFOLDED PROTEIN RESPONSE	0.362262	0.95	0.262915	0.454008	4104282	1.94e-11	Spearman correlation	338	STAD
SQSTM1	UV RESPONSE DN	-0.345701	0.95	-0.438848	-0.245204	8660516	1.76e-10	Spearman correlation	338	STAD
SQSTM1	UV RESPONSE UP	0.232847	0.95	0.12627	0.33411	4937160	2.82e-05	Spearman correlation	338	STAD
SQSTM1	WNT BETA CATENIN SIGNALING	-0.184423	0.95	-0.288389	-0.0761601	7622580	0.00105357	Spearman correlation	338	STAD
SQSTM1	ADIPOGENESIS	0.376846	0.95	0.211203	0.521448	207744	2.7e-05	Spearman correlation	126	TGCT
SQSTM1	ALLOGRAFT REJECTION	0.388532	0.95	0.224245	0.531346	203848	1.4e-05	Spearman correlation	126	TGCT
SQSTM1	APOPTOSIS	0.505464	0.95	0.358069	0.628278	164866	3.93e-09	Spearman correlation	126	TGCT
SQSTM1	CHOLESTEROL HOMEOSTASIS	0.296348	0.95	0.122938	0.452198	234580	0.00126898	Spearman correlation	126	TGCT
SQSTM1	COAGULATION	0.224693	0.95	0.0466108	0.388932	258468	0.0167223	Spearman correlation	126	TGCT
SQSTM1	COMPLEMENT	0.458964	0.95	0.304116	0.590182	180368	1.49e-07	Spearman correlation	126	TGCT
SQSTM1	DNA REPAIR	0.321857	0.95	0.150614	0.474348	226076	0.000422759	Spearman correlation	126	TGCT
SQSTM1	FATTY ACID METABOLISM	0.307183	0.95	0.13466	0.461629	230968	0.000807612	Spearman correlation	126	TGCT
SQSTM1	GLYCOLYSIS	0.213054	0.95	0.0344067	0.378508	262348	0.0236073	Spearman correlation	126	TGCT
SQSTM1	HYPOXIA	0.209455	0.95	0.030643	0.375276	263548	0.0261753	Spearman correlation	126	TGCT
SQSTM1	IL2 STAT5 SIGNALING	0.444307	0.95	0.287314	0.578053	185254	4.22e-07	Spearman correlation	126	TGCT
SQSTM1	IL6 JAK STAT3 SIGNALING	0.461639	0.95	0.307194	0.592391	179476	1.23e-07	Spearman correlation	126	TGCT
SQSTM1	INFLAMMATORY RESPONSE	0.526029	0.95	0.382249	0.644941	158010	6.58e-10	Spearman correlation	126	TGCT
SQSTM1	INTERFERON ALPHA RESPONSE	0.327484	0.95	0.156756	0.479208	224200	0.000324546	Spearman correlation	126	TGCT
SQSTM1	INTERFERON GAMMA RESPONSE	0.39503	0.95	0.231522	0.536832	201682	9.58e-06	Spearman correlation	126	TGCT
SQSTM1	KRAS SIGNALING DN	-0.282352	0.95	-0.439962	-0.107866	427504	0.00222413	Spearman correlation	126	TGCT
SQSTM1	KRAS SIGNALING UP	0.239301	0.95	0.0620045	0.401957	253598	0.0105282	Spearman correlation	126	TGCT
SQSTM1	MITOTIC SPINDLE	-0.319943	0.95	-0.472693	-0.148528	440036	0.000460076	Spearman correlation	126	TGCT
SQSTM1	MTORC1 SIGNALING	0.552786	0.95	0.414006	0.666452	149090	5.32e-11	Spearman correlation	126	TGCT
SQSTM1	MYC TARGETS V1	0.360282	0.95	0.192817	0.507353	213266	6.53e-05	Spearman correlation	126	TGCT
SQSTM1	MYC TARGETS V2	0.26097	0.95	0.0849954	0.421157	246374	0.00492885	Spearman correlation	126	TGCT
SQSTM1	OXIDATIVE PHOSPHORYLATION	0.481011	0.95	0.329574	0.608318	173018	2.85e-08	Spearman correlation	126	TGCT
SQSTM1	P53 PATHWAY	0.508253	0.95	0.361338	0.630545	163936	3.1e-09	Spearman correlation	126	TGCT
SQSTM1	PI3K AKT MTOR SIGNALING	0.457842	0.95	0.302827	0.589256	180742	1.61e-07	Spearman correlation	126	TGCT
SQSTM1	REACTIVE OXYGEN SPECIES PATHWAY	0.580724	0.95	0.447529	0.688713	139776	2.94e-12	Spearman correlation	126	TGCT
SQSTM1	TNFA SIGNALING VIA NFKB	0.560711	0.95	0.423477	0.672787	146448	2.4e-11	Spearman correlation	126	TGCT
SQSTM1	UNFOLDED PROTEIN RESPONSE	0.399421	0.95	0.236451	0.540533	200218	7.43e-06	Spearman correlation	126	TGCT
SQSTM1	UV RESPONSE UP	0.346898	0.95	0.178046	0.495905	217728	0.000128594	Spearman correlation	126	TGCT
SQSTM1	XENOBIOTIC METABOLISM	0.220421	0.95	0.0421256	0.385112	259892	0.0190926	Spearman correlation	126	TGCT
SQSTM1	ADIPOGENESIS	0.184314	0.95	0.0927992	0.27274	14114434	8.48e-05	Spearman correlation	470	THCA
SQSTM1	ALLOGRAFT REJECTION	-0.145822	0.95	-0.235728	-0.05344	19827016	0.00203178	Spearman correlation	470	THCA
SQSTM1	ANGIOGENESIS	-0.370905	0.95	-0.448523	-0.287734	23721802	2.14e-16	Spearman correlation	470	THCA
SQSTM1	APICAL JUNCTION	-0.237143	0.95	-0.323115	-0.147288	21407212	3.26e-07	Spearman correlation	470	THCA
SQSTM1	APICAL SURFACE	-0.31765	0.95	-0.398958	-0.231386	22800292	3.61e-12	Spearman correlation	470	THCA
SQSTM1	APOPTOSIS	-0.20902	0.95	-0.29636	-0.118213	20920586	7.48e-06	Spearman correlation	470	THCA
SQSTM1	COAGULATION	-0.236291	0.95	-0.322307	-0.146405	21392474	3.6e-07	Spearman correlation	470	THCA
SQSTM1	COMPLEMENT	-0.253023	0.95	-0.338164	-0.163774	21682006	4.56e-08	Spearman correlation	470	THCA
SQSTM1	DNA REPAIR	0.269831	0.95	0.181278	0.354043	12634668	4.98e-09	Spearman correlation	470	THCA
SQSTM1	E2F TARGETS	0.196035	0.95	0.104842	0.28396	13911608	2.81e-05	Spearman correlation	470	THCA
SQSTM1	EPITHELIAL MESENCHYMAL TRANSITION	-0.264374	0.95	-0.348894	-0.17559	21878426	1.04e-08	Spearman correlation	470	THCA
SQSTM1	ESTROGEN RESPONSE LATE	-0.13683	0.95	-0.227045	-0.0442875	19671434	0.00383904	Spearman correlation	470	THCA
SQSTM1	HEDGEHOG SIGNALING	-0.466144	0.95	-0.535988	-0.389961	25369790	3.08e-26	Spearman correlation	470	THCA
SQSTM1	HEME METABOLISM	-0.191378	0.95	-0.279505	-0.100054	20615312	4.41e-05	Spearman correlation	470	THCA
SQSTM1	HYPOXIA	-0.335714	0.95	-0.415824	-0.250435	23112874	1.64e-13	Spearman correlation	470	THCA
SQSTM1	IL2 STAT5 SIGNALING	-0.220069	0.95	-0.306888	-0.129618	21111780	2.3e-06	Spearman correlation	470	THCA
SQSTM1	IL6 JAK STAT3 SIGNALING	-0.214701	0.95	-0.301776	-0.124074	21018892	4.11e-06	Spearman correlation	470	THCA
SQSTM1	INFLAMMATORY RESPONSE	-0.192835	0.95	-0.280899	-0.101551	20640528	3.83e-05	Spearman correlation	470	THCA
SQSTM1	INTERFERON ALPHA RESPONSE	-0.0949435	0.95	-0.186403	-0.00185276	18946634	0.047233	Spearman correlation	470	THCA
SQSTM1	INTERFERON GAMMA RESPONSE	-0.100783	0.95	-0.192088	-0.00774875	19047682	0.0348759	Spearman correlation	470	THCA
SQSTM1	KRAS SIGNALING DN	-0.478962	0.95	-0.547647	-0.403866	25591602	7.96e-28	Spearman correlation	470	THCA
SQSTM1	KRAS SIGNALING UP	-0.201574	0.95	-0.289253	-0.110542	20791748	1.62e-05	Spearman correlation	470	THCA
SQSTM1	MITOTIC SPINDLE	-0.118192	0.95	-0.209	-0.0253644	19348928	0.0129656	Spearman correlation	470	THCA
SQSTM1	MTORC1 SIGNALING	0.301274	0.95	0.214174	0.38362	12090588	5.03e-11	Spearman correlation	470	THCA
SQSTM1	MYC TARGETS V1	0.337238	0.95	0.252045	0.417244	11468264	1.25e-13	Spearman correlation	470	THCA
SQSTM1	MYC TARGETS V2	0.486218	0.95	0.411751	0.554234	8890362	9.5e-29	Spearman correlation	470	THCA
SQSTM1	MYOGENESIS	-0.334866	0.95	-0.415033	-0.249539	23098200	1.9e-13	Spearman correlation	470	THCA
SQSTM1	NOTCH SIGNALING	-0.311248	0.95	-0.392967	-0.224651	22689512	1.03e-11	Spearman correlation	470	THCA
SQSTM1	OXIDATIVE PHOSPHORYLATION	0.334148	0.95	0.24878	0.414363	11521748	2.16e-13	Spearman correlation	470	THCA
SQSTM1	PANCREAS BETA CELLS	-0.243901	0.95	-0.329525	-0.154298	21524154	1.43e-07	Spearman correlation	470	THCA
SQSTM1	PROTEIN SECRETION	0.276156	0.95	0.18788	0.360007	12525216	2.09e-09	Spearman correlation	470	THCA
SQSTM1	REACTIVE OXYGEN SPECIES PATHWAY	0.145194	0.95	0.0528002	0.235122	14791362	0.00212375	Spearman correlation	470	THCA
SQSTM1	SPERMATOGENESIS	-0.422509	0.95	-0.4961	-0.342891	24614750	2.49e-21	Spearman correlation	470	THCA
SQSTM1	TGF BETA SIGNALING	-0.311335	0.95	-0.393048	-0.224742	22691014	1.02e-11	Spearman correlation	470	THCA
SQSTM1	TNFA SIGNALING VIA NFKB	-0.182219	0.95	-0.270733	-0.0906495	20456822	0.000102861	Spearman correlation	470	THCA
SQSTM1	UNFOLDED PROTEIN RESPONSE	0.170963	0.95	0.0791148	0.259932	14345460	0.000278765	Spearman correlation	470	THCA
SQSTM1	UV RESPONSE DN	-0.325636	0.95	-0.406421	-0.2398	22938486	9.47e-13	Spearman correlation	470	THCA
SQSTM1	UV RESPONSE UP	-0.140483	0.95	-0.230574	-0.0480036	19734636	0.00296941	Spearman correlation	470	THCA
SQSTM1	WNT BETA CATENIN SIGNALING	-0.485574	0.95	-0.55365	-0.411051	25706008	1.15e-28	Spearman correlation	470	THCA
SQSTM1	XENOBIOTIC METABOLISM	-0.193129	0.95	-0.28118	-0.101854	20645618	3.73e-05	Spearman correlation	470	THCA
SQSTM1	CHOLESTEROL HOMEOSTASIS	0.420269	0.95	0.240412	0.572226	102526	2.43e-05	Spearman correlation	102	THYM
SQSTM1	E2F TARGETS	-0.217104	0.95	-0.399809	-0.0178054	215246	0.0393046	Spearman correlation	102	THYM
SQSTM1	ESTROGEN RESPONSE LATE	0.265099	0.95	0.0686693	0.441741	129968	0.0107443	Spearman correlation	102	THYM
SQSTM1	G2M CHECKPOINT	-0.257624	0.95	-0.435261	-0.0606796	222412	0.0133104	Spearman correlation	102	THYM
SQSTM1	INTERFERON ALPHA RESPONSE	0.255158	0.95	0.0580501	0.433119	131726	0.0142702	Spearman correlation	102	THYM
SQSTM1	INTERFERON GAMMA RESPONSE	0.216527	0.95	0.0172004	0.399301	138558	0.0398186	Spearman correlation	102	THYM
SQSTM1	MITOTIC SPINDLE	-0.377906	0.95	-0.537349	-0.192379	243684	0.000176695	Spearman correlation	102	THYM
SQSTM1	OXIDATIVE PHOSPHORYLATION	0.218449	0.95	0.0192177	0.400995	138218	0.0380087	Spearman correlation	102	THYM
SQSTM1	P53 PATHWAY	0.266083	0.95	0.0697228	0.442593	129794	0.0104396	Spearman correlation	102	THYM
SQSTM1	PI3K AKT MTOR SIGNALING	-0.226422	0.95	-0.408011	-0.0276009	216894	0.0310546	Spearman correlation	102	THYM
SQSTM1	SPERMATOGENESIS	-0.29561	0.95	-0.468003	-0.101544	229130	0.00417535	Spearman correlation	102	THYM
SQSTM1	ADIPOGENESIS	0.224513	0.95	0.138923	0.306773	1.83837e+07	4.51e-07	Spearman correlation	522	UCEC
SQSTM1	ANGIOGENESIS	-0.12854	0.95	-0.21445	-0.0406559	2.67532e+07	0.00475239	Spearman correlation	522	UCEC
SQSTM1	APICAL JUNCTION	-0.117292	0.95	-0.203529	-0.0292502	2.64866e+07	0.0103015	Spearman correlation	522	UCEC
SQSTM1	APOPTOSIS	0.132224	0.95	0.0443978	0.218023	2.05715e+07	0.0036487	Spearman correlation	522	UCEC
SQSTM1	BILE ACID METABOLISM	-0.0953869	0.95	-0.182197	-0.0071014	2.59673e+07	0.0381922	Spearman correlation	522	UCEC
SQSTM1	CHOLESTEROL HOMEOSTASIS	0.303311	0.95	0.220884	0.381435	1.65157e+07	4.11e-12	Spearman correlation	522	UCEC
SQSTM1	EPITHELIAL MESENCHYMAL TRANSITION	-0.130861	0.95	-0.216701	-0.0430134	2.68082e+07	0.00402263	Spearman correlation	522	UCEC
SQSTM1	ESTROGEN RESPONSE EARLY	0.145701	0.95	0.0581039	0.231072	2.0252e+07	0.00132638	Spearman correlation	522	UCEC
SQSTM1	ESTROGEN RESPONSE LATE	0.144109	0.95	0.0564827	0.229532	2.02898e+07	0.00149888	Spearman correlation	522	UCEC
SQSTM1	FATTY ACID METABOLISM	0.136267	0.95	0.0485052	0.22194	2.04757e+07	0.00272162	Spearman correlation	522	UCEC
SQSTM1	GLYCOLYSIS	0.268639	0.95	0.184676	0.348708	1.73377e+07	1.08e-09	Spearman correlation	522	UCEC
SQSTM1	HEDGEHOG SIGNALING	-0.185378	0.95	-0.269312	-0.0986479	2.81006e+07	3.63e-05	Spearman correlation	522	UCEC
SQSTM1	HYPOXIA	0.101889	0.95	0.0136667	0.188537	2.12906e+07	0.0263645	Spearman correlation	522	UCEC
SQSTM1	IL6 JAK STAT3 SIGNALING	0.0921709	0.95	0.00385699	0.179058	2.1521e+07	0.045464	Spearman correlation	522	UCEC
SQSTM1	INFLAMMATORY RESPONSE	0.0996775	0.95	0.0114329	0.186382	2.13431e+07	0.0299983	Spearman correlation	522	UCEC
SQSTM1	KRAS SIGNALING DN	-0.304878	0.95	-0.382909	-0.222526	3.09335e+07	3.15e-12	Spearman correlation	522	UCEC
SQSTM1	MTORC1 SIGNALING	0.292235	0.95	0.209293	0.371002	1.67783e+07	2.61e-11	Spearman correlation	522	UCEC
SQSTM1	MYC TARGETS V2	0.16145	0.95	0.074162	0.246282	1.98787e+07	0.000349357	Spearman correlation	522	UCEC
SQSTM1	MYOGENESIS	-0.217618	0.95	-0.300192	-0.131807	2.88649e+07	1.04e-06	Spearman correlation	522	UCEC
SQSTM1	OXIDATIVE PHOSPHORYLATION	0.211796	0.95	0.125805	0.294628	1.86852e+07	2.06e-06	Spearman correlation	522	UCEC
SQSTM1	P53 PATHWAY	0.260143	0.95	0.175839	0.340659	1.75391e+07	3.83e-09	Spearman correlation	522	UCEC
SQSTM1	PANCREAS BETA CELLS	-0.182167	0.95	-0.266228	-0.0953565	2.80245e+07	5e-05	Spearman correlation	522	UCEC
SQSTM1	REACTIVE OXYGEN SPECIES PATHWAY	0.383412	0.95	0.305411	0.456301	1.46169e+07	4.24e-19	Spearman correlation	522	UCEC
SQSTM1	SPERMATOGENESIS	-0.454524	0.95	-0.521912	-0.381498	3.4481e+07	3.77e-27	Spearman correlation	522	UCEC
SQSTM1	TGF BETA SIGNALING	-0.138989	0.95	-0.224577	-0.0512731	2.70009e+07	0.00222543	Spearman correlation	522	UCEC
SQSTM1	TNFA SIGNALING VIA NFKB	0.204125	0.95	0.117906	0.287289	1.8867e+07	4.88e-06	Spearman correlation	522	UCEC
SQSTM1	UNFOLDED PROTEIN RESPONSE	0.233262	0.95	0.147966	0.315114	1.81763e+07	1.48e-07	Spearman correlation	522	UCEC
SQSTM1	UV RESPONSE DN	-0.157033	0.95	-0.242021	-0.0696544	2.74287e+07	0.000513106	Spearman correlation	522	UCEC
SQSTM1	ADIPOGENESIS	0.526931	0.95	0.291781	0.702015	11734	0.000220353	Spearman correlation	53	UCS
SQSTM1	APOPTOSIS	0.334623	0.95	0.0625688	0.560389	16504	0.030335	Spearman correlation	53	UCS
SQSTM1	FATTY ACID METABOLISM	0.342606	0.95	0.0715446	0.566543	16306	0.0264011	Spearman correlation	53	UCS
SQSTM1	INTERFERON ALPHA RESPONSE	0.383083	0.95	0.117745	0.597367	15302	0.0116594	Spearman correlation	53	UCS
SQSTM1	INTERFERON GAMMA RESPONSE	0.38518	0.95	0.120169	0.598947	15250	0.0111713	Spearman correlation	53	UCS
SQSTM1	KRAS SIGNALING DN	-0.515159	0.95	-0.693726	-0.276928	37582	0.000325343	Spearman correlation	53	UCS
SQSTM1	MITOTIC SPINDLE	-0.364619	0.95	-0.583384	-0.0965259	33848	0.0171947	Spearman correlation	53	UCS
SQSTM1	MTORC1 SIGNALING	0.44009	0.95	0.184819	0.639731	13888	0.00298934	Spearman correlation	53	UCS
SQSTM1	MYOGENESIS	-0.329302	0.95	-0.556273	-0.0566092	32972	0.0333297	Spearman correlation	53	UCS
SQSTM1	NOTCH SIGNALING	-0.359297	0.95	-0.57933	-0.0904553	33716	0.0191983	Spearman correlation	53	UCS
SQSTM1	OXIDATIVE PHOSPHORYLATION	0.473714	0.95	0.225528	0.664161	13054	0.00118733	Spearman correlation	53	UCS
SQSTM1	P53 PATHWAY	0.402838	0.95	0.140717	0.612184	14812	0.00742642	Spearman correlation	53	UCS
SQSTM1	PANCREAS BETA CELLS	-0.347686	0.95	-0.570446	-0.0772795	33428	0.023905	Spearman correlation	53	UCS
SQSTM1	REACTIVE OXYGEN SPECIES PATHWAY	0.554104	0.95	0.326504	0.720969	11060	8.54e-05	Spearman correlation	53	UCS
SQSTM1	SPERMATOGENESIS	-0.407837	0.95	-0.615911	-0.146576	34920	0.00666247	Spearman correlation	53	UCS
SQSTM1	UNFOLDED PROTEIN RESPONSE	0.395581	0.95	0.132245	0.606758	14992	0.00880433	Spearman correlation	53	UCS
SQSTM1	WNT BETA CATENIN SIGNALING	-0.334865	0.95	-0.560576	-0.0628401	33110	0.0302272	Spearman correlation	53	UCS
SQSTM1	ADIPOGENESIS	0.27391	0.95	0.0464761	0.474346	55238	0.021629	Spearman correlation	77	UVM
SQSTM1	ANDROGEN RESPONSE	0.355618	0.95	0.136428	0.541614	49022	0.00236431	Spearman correlation	77	UVM
SQSTM1	APOPTOSIS	0.321494	0.95	0.0984163	0.513808	51618	0.00633473	Spearman correlation	77	UVM
SQSTM1	BILE ACID METABOLISM	0.310558	0.95	0.0863701	0.50481	52450	0.00855705	Spearman correlation	77	UVM
SQSTM1	COAGULATION	0.379831	0.95	0.163796	0.561101	47180	0.00109275	Spearman correlation	77	UVM
SQSTM1	COMPLEMENT	0.336059	0.95	0.114561	0.525726	50510	0.00419115	Spearman correlation	77	UVM
SQSTM1	ESTROGEN RESPONSE EARLY	0.414323	0.95	0.203366	0.588518	44556	0.000328631	Spearman correlation	77	UVM
SQSTM1	ESTROGEN RESPONSE LATE	0.349729	0.95	0.129822	0.536845	49470	0.00281297	Spearman correlation	77	UVM
SQSTM1	FATTY ACID METABOLISM	0.314107	0.95	0.0902722	0.507734	52180	0.007775	Spearman correlation	77	UVM
SQSTM1	GLYCOLYSIS	0.3899	0.95	0.175276	0.569146	46414	0.000776379	Spearman correlation	77	UVM
SQSTM1	HEDGEHOG SIGNALING	0.318944	0.95	0.0956016	0.511713	51812	0.0067883	Spearman correlation	77	UVM
SQSTM1	HEME METABOLISM	0.451575	0.95	0.246891	0.617685	41722	7.58e-05	Spearman correlation	77	UVM
SQSTM1	HYPOXIA	0.329907	0.95	0.107727	0.520701	50978	0.00500078	Spearman correlation	77	UVM
SQSTM1	IL2 STAT5 SIGNALING	0.361691	0.95	0.143261	0.546521	48560	0.00196596	Spearman correlation	77	UVM
SQSTM1	IL6 JAK STAT3 SIGNALING	0.269467	0.95	0.0416884	0.47062	55576	0.0240311	Spearman correlation	77	UVM
SQSTM1	INFLAMMATORY RESPONSE	0.331931	0.95	0.109974	0.522356	50824	0.00472422	Spearman correlation	77	UVM
SQSTM1	INTERFERON ALPHA RESPONSE	0.245386	0.95	0.0159192	0.450298	57408	0.0414546	Spearman correlation	77	UVM
SQSTM1	INTERFERON GAMMA RESPONSE	0.250565	0.95	0.0214357	0.454687	57014	0.0370495	Spearman correlation	77	UVM
SQSTM1	KRAS SIGNALING UP	0.307508	0.95	0.0830227	0.502293	52682	0.00928604	Spearman correlation	77	UVM
SQSTM1	MTORC1 SIGNALING	0.487644	0.95	0.289836	0.645498	38978	1.57e-05	Spearman correlation	77	UVM
SQSTM1	MYC TARGETS V2	-0.241706	0.95	-0.447173	-0.0120074	94464	0.0448994	Spearman correlation	77	UVM
SQSTM1	P53 PATHWAY	0.457884	0.95	0.254346	0.62258	41242	5.81e-05	Spearman correlation	77	UVM
SQSTM1	PEROXISOME	0.36453	0.95	0.146463	0.54881	48344	0.00179771	Spearman correlation	77	UVM
SQSTM1	PI3K AKT MTOR SIGNALING	0.392949	0.95	0.178764	0.571576	46182	0.000704364	Spearman correlation	77	UVM
SQSTM1	PROTEIN SECRETION	0.390951	0.95	0.176478	0.569984	46334	0.000751213	Spearman correlation	77	UVM
SQSTM1	REACTIVE OXYGEN SPECIES PATHWAY	0.35086	0.95	0.131088	0.537761	49384	0.00271848	Spearman correlation	77	UVM
SQSTM1	SPERMATOGENESIS	0.312766	0.95	0.0887972	0.50663	52282	0.00806176	Spearman correlation	77	UVM
SQSTM1	TNFA SIGNALING VIA NFKB	0.357458	0.95	0.138496	0.543103	48882	0.00223316	Spearman correlation	77	UVM
SQSTM1	UNFOLDED PROTEIN RESPONSE	0.455308	0.95	0.251299	0.620583	41438	6.48e-05	Spearman correlation	77	UVM
SQSTM1	UV RESPONSE UP	0.423182	0.95	0.213643	0.595496	43882	0.000235925	Spearman correlation	77	UVM
