# Supplementary material for: Comprehensive pan-cancer analysis of p62 reveals its contribution to shaping tumor microenvironment and anti-tumor immunity
Source: Discov Oncol. 2025 Nov 25;16:2296. doi: 10.1007/s12672-025-04135-1 (PMC12748421; doi:10.1007/s12672-025-04135-1)
Supplement: Supplementary file 10 — Additional file10 (XLSX 16 KB) [file 12672_2025_4135_MOESM10_ESM.xlsx]

## Sheet: SQSTM1_RNAss_score_corr
cancer	estimate	statistic	p.value	method
ACC	-0.195407	87444	0.0907159	Spearman's rank correlation rho
BLCA	0.22074	8.00423e+06	9.51336e-06	Spearman's rank correlation rho
BRCA	0.240966	1.01101e+08	1.00243e-13	Spearman's rank correlation rho
CESC	0.278063	1948510	7.12816e-06	Spearman's rank correlation rho
CHOL	0.390196	4354	0.0204872	Spearman's rank correlation rho
COAD	0.31543	5.41239e+06	8.35135e-10	Spearman's rank correlation rho
DLBC	0.107563	6372	0.538535	Spearman's rank correlation rho
ESCA	0.348834	351808	1.39243e-05	Spearman's rank correlation rho
GBM	-0.189368	466332	0.0290306	Spearman's rank correlation rho
HNSC	0.13436	1.55598e+07	0.00331399	Spearman's rank correlation rho
KICH	0.139286	37596	0.272342	Spearman's rank correlation rho
KIRC	0.510276	2.52688e+06	3.22146e-22	Spearman's rank correlation rho
KIRP	0.590474	1313798	1.41706e-26	Spearman's rank correlation rho
LGG	-0.186377	22004164	3.90504e-05	Spearman's rank correlation rho
LIHC	0.279958	4758458	1.47029e-07	Spearman's rank correlation rho
LUAD	0.304776	1.34658e+07	5.99371e-12	Spearman's rank correlation rho
LUSC	0.26489	1.20816e+07	7.3915e-09	Spearman's rank correlation rho
MESO	0.315165	42594	0.00700612	Spearman's rank correlation rho
OV	0.0179198	877194	0.813916	Spearman's rank correlation rho
PAAD	0.38139	221314	8.22132e-06	Spearman's rank correlation rho
PCPG	0.344891	414494	1.03804e-05	Spearman's rank correlation rho
PRAD	0.368113	9789952	5.52581e-16	Spearman's rank correlation rho
READ	0.294397	169672	0.00155006	Spearman's rank correlation rho
SARC	0.205185	1.52909e+06	0.00193161	Spearman's rank correlation rho
SKCM	0.390216	95644	7.12586e-05	Spearman's rank correlation rho
STAD	0.287779	4188718	1.129e-07	Spearman's rank correlation rho
TGCT	0.130949	282876	0.145496	Spearman's rank correlation rho
THCA	0.537127	7756526	4.11394e-36	Spearman's rank correlation rho
THYM	0.0566409	166834	0.571768	Spearman's rank correlation rho
UCEC	0.20994	1.65585e+07	2.13427e-06	Spearman's rank correlation rho
UCS	0.203354	19760	0.144167	Spearman's rank correlation rho
UVM	0.111257	67612	0.335395	Spearman's rank correlation rho

## Sheet: SQSTM1_DNAss_score_corr
cancer	estimate	statistic	p.value	method
ACC	0.214327	57472	0.0630047	Spearman's rank correlation rho
BLCA	-0.0203023	1.08017e+07	0.685987	Spearman's rank correlation rho
BRCA	0.0396864	4.72807e+07	0.306466	Spearman's rank correlation rho
CESC	-0.0391122	2804568	0.535736	Spearman's rank correlation rho
CHOL	-0.14958	8208	0.391098	Spearman's rank correlation rho
COAD	0.200916	3.21462e+06	0.000590665	Spearman's rank correlation rho
DLBC	0.0843137	6538	0.630125	Spearman's rank correlation rho
ESCA	-0.011509	546492	0.889584	Spearman's rank correlation rho
GBM	-0.166417	12434	0.304744	Spearman's rank correlation rho
HNSC	-0.140972	2.05089e+07	0.00204954	Spearman's rank correlation rho
KICH	0.008837	43294	0.944748	Spearman's rank correlation rho
KIRC	-0.12587	2.89686e+06	0.0472441	Spearman's rank correlation rho
KIRP	-0.175208	3247712	0.00501848	Spearman's rank correlation rho
LGG	-0.104717	20489584	0.0216207	Spearman's rank correlation rho
LIHC	0.1574	5568388	0.00356722	Spearman's rank correlation rho
LUAD	-0.0661071	1.51358e+07	0.166284	Spearman's rank correlation rho
LUSC	-0.10133	7342444	0.0612244	Spearman's rank correlation rho
MESO	-0.243617	77348	0.0391924	Spearman's rank correlation rho
OV	0.392857	34	0.383317	Spearman's rank correlation rho
PAAD	0.0872596	326542	0.325455	Spearman's rank correlation rho
PCPG	0.390018	385942	4.83109e-07	Spearman's rank correlation rho
PRAD	0.0582896	14590112	0.215624	Spearman's rank correlation rho
READ	-0.0642954	94254	0.568505	Spearman's rank correlation rho
SARC	0.0163331	1.8924e+06	0.80708	Spearman's rank correlation rho
SKCM	-0.0725985	168236	0.477453	Spearman's rank correlation rho
STAD	0.0362182	5020590	0.521871	Spearman's rank correlation rho
TGCT	-0.113708	362512	0.206725	Spearman's rank correlation rho
THCA	-0.12618	18871808	0.00643975	Spearman's rank correlation rho
THYM	0.285398	126378	0.00364228	Spearman's rank correlation rho
UCEC	-0.12422	1.19019e+07	0.0130235	Spearman's rank correlation rho
UCS	-0.0815191	26826	0.561723	Spearman's rank correlation rho
UVM	0.0757663	70312	0.512523	Spearman's rank correlation rho
