# Supplementary material for: Comprehensive pan-cancer analysis of p62 reveals its contribution to shaping tumor microenvironment and anti-tumor immunity
Source: Discov Oncol. 2025 Nov 25;16:2296. doi: 10.1007/s12672-025-04135-1 (PMC12748421; doi:10.1007/s12672-025-04135-1)
Supplement: Supplementary file 11 — Additional file11 (XLSX 11 KB) [file 12672_2025_4135_MOESM11_ESM.xlsx]

## Sheet: Sheet1
Calculated Docking RMSD: 0.422
Total # of Possible Mappings: 1048576
Optimal mapping (First file -> Second file, * indicates correspondence is not one-to-one):
O 1 -> O 1
C 2 -> C 2
C 3 -> C 3
C 4 -> C 4
C 5 -> C 5
C 6 -> C 6
C 7 -> C 7
N 8 -> N 12 *
C 9 -> C 10 *
C 10 -> C 9 *
C 11 -> C 11
C 12 -> C 21 *
C 13 -> C 20 *
C 14 -> C 13 *
C 15 -> C 15
C 16 -> C 14 *
C 17 -> C 16 *
C 18 -> C 19 *
C 19 -> C 18 *
C 20 -> C 17 *
C 21 -> C 22 *
N 22 -> N 24 *
C 23 -> C 23
O 24 -> O 25 *
C 25 -> C 26 *
C 26 -> C 27 *
C 27 -> C 29 *
C 28 -> C 30 *
C 29 -> C 31 *
C 30 -> C 28 *
N 31 -> N 8 *
O 32 -> O 32
C 33 -> C 33
N 34 -> N 34
C 35 -> C 35
