# Supplementary material for: Comprehensive pan-cancer analysis of p62 reveals its contribution to shaping tumor microenvironment and anti-tumor immunity
Source: Discov Oncol. 2025 Nov 25;16:2296. doi: 10.1007/s12672-025-04135-1 (PMC12748421; doi:10.1007/s12672-025-04135-1)
Supplement: Supplementary file 12 — Additional file12 (XLSX 15 KB) [file 12672_2025_4135_MOESM12_ESM.xlsx]

## Sheet: Sheet1
Docking results				SwissADME
Zinc ID	Binding Affinity	rmsd/ub	rmsd/lb	Formula	Lipinski #violations	Ghose #violations	Veber #violations	Egan #violations	Muegge #violations	MW	#H-bond acceptors	#H-bond donors	MLOGP	#Heavy atoms	#Aromatic heavy atoms	Fraction Csp3	#Rotatable bonds	MR	TPSA	iLOGP	XLOGP3	WLOGP	Silicos-IT Log P	Consensus Log P	ESOL Log S	ESOL Solubility (mg/ml)	ESOL Solubility (mol/l)	ESOL Class	Ali Log S	Ali Solubility (mg/ml)	Ali Solubility (mol/l)	Ali Class	Silicos-IT LogSw	Silicos-IT Solubility (mg/ml)	Silicos-IT Solubility (mol/l)	Silicos-IT class	GI absorption	BBB permeant	Pgp substrate	CYP1A2 inhibitor	CYP2C19 inhibitor	CYP2C9 inhibitor	CYP2D6 inhibitor	CYP3A4 inhibitor	log Kp (cm/s)	Bioavailability Score	PAINS #alerts	Brenk #alerts	Leadlikeness #violations
ZINC02140075	-9.2	0	0	C27H18F5N3O3	2	3	0	1	1	527.44	8	1	5.58	38	21	0.19	3	133.68	65.64	3.73	5.22	7.52	6.2	5.65	-6.61	0.00013	2.46e-07	Poorly soluble	-6.35	0.000238	4.5e-07	Poorly soluble	-9.61	1.3e-07	2.47e-10	Poorly soluble	Low	No	Yes	No	No	Yes	No	No	-5.81	0.17	0	3	2
ZINC08789284	-9	0	0	C31H44O4	1	4	0	1	1	480.68	4	0	5.16	35	0	0.87	0	137.43	36.92	5.03	4.76	6.84	5.73	5.5	-5.82	0.000729	1.52e-06	Moderately soluble	-5.27	0.00261	5.42e-06	Moderately soluble	-6.26	0.000263	5.47e-07	Poorly soluble	Low	No	No	No	No	No	No	No	-5.85	0.55	0	1	2
ZINC08877690	-9.1	0	0	C31H32N2O5	1	2	0	0	0	512.6	5	0	3.56	38	19	0.45	4	151.03	85.66	4.55	3.91	4.39	6.12	4.51	-5.59	0.00133	2.59e-06	Moderately soluble	-5.41	0.00201	3.91e-06	Moderately soluble	-8.71	9.97e-07	1.95e-09	Poorly soluble	High	No	Yes	No	Yes	Yes	Yes	Yes	-6.65	0.55	0	1	2
ZINC70669789	-9.3	0	0	C40H64N2O2	1	2	0	0	0	604.95	4	2	3.56	44	0	0.95	1	186.14	65.18	4.55	3.91	9.08	6.12	4.51	-5.59	0.00133	2.59e-06	Moderately soluble	-5.41	0.00201	3.91e-06	Moderately soluble	-8.71	9.97e-07	1.95e-09	Poorly soluble	High	No	Yes	No	Yes	Yes	Yes	Yes	-6.65	0.55	0	1	2
ZINC79190247	-9	0	0	C33H33NO7	1	3	0	0	1	555.62	7	1	4.09	41	16	0.39	1	155.9	111.9	3.89	5.15	5.47	5.31	4.78	-6.75	9.83e-05	1.77e-07	Poorly soluble	-7.25	3.16e-05	5.69e-08	Poorly soluble	-7.81	8.67e-06	1.56e-08	Poorly soluble	Low	No	No	No	No	Yes	No	Yes	-6.03	0.55	0	1	2
ZINC85893430	-9.2	0	0	C44H48N4O10	2	3	1	1	2	792.87	10	0	1.81	58	24	0.45	4	220.05	140	4.46	2.68	3.03	3.17	3.03	-6.49	0.000259	3.26e-07	Poorly soluble	-5.27	0.00424	5.34e-06	Moderately soluble	-8.41	3.05e-06	3.85e-09	Poorly soluble	Low	No	Yes	No	No	Yes	No	Yes	-9.23	0.17	0	0	1
ZINC217598959	-9	0	0	C23H19NO4	0	0	0	0	0	373.4	4	1	2.87	28	12	0.22	1	109.21	64.63	3.1	4.48	3.75	4.49	3.74	-5.23	0.00221	5.91e-06	Moderately soluble	-5.56	0.00103	2.77e-06	Moderately soluble	-6.49	0.000122	3.27e-07	Poorly soluble	High	Yes	No	Yes	Yes	Yes	No	Yes	-5.4	0.55	0	2	2
ZINC217623094	-9	0	0	C24H19NO6	0	0	0	0	0	417.41	6	1	2.37	31	16	0.21	2	113.61	94.69	3.23	3.53	3.85	5.14	3.62	-4.9	0.00523	1.25e-05	Moderately soluble	-5.2	0.00262	6.27e-06	Moderately soluble	-7.37	1.77e-05	4.24e-08	Poorly soluble	High	No	No	No	Yes	Yes	No	Yes	-6.34	0.55	0	2	2
ZINC217626420	-9.3	0	0	C23H16O6	0	0	0	0	0	388.37	6	0	1.88	29	16	0.17	1	105.03	82.81	3.24	3.77	4.1	4.95	3.59	-4.97	0.00421	1.08e-05	Moderately soluble	-5.2	0.00244	6.28e-06	Moderately soluble	-7.27	2.07e-05	5.33e-08	Poorly soluble	High	No	No	Yes	Yes	Yes	No	Yes	-5.99	0.55	0	2	2
ZINC217664974	-9	0	0	C25H21NO6	0	0	0	0	0	431.44	6	0	2.58	32	16	0.24	2	118.51	83.83	3.61	3.71	3.86	4.63	3.68	-5.09	0.00351	8.12e-06	Moderately soluble	-5.16	0.00297	6.89e-06	Moderately soluble	-6.92	5.16e-05	1.2e-07	Poorly soluble	High	No	No	No	Yes	Yes	No	Yes	-6.3	0.55	0	2	2
ZINC217667805	-9	0	0	C23H17NO5	0	0	0	0	0	387.38	5	1	2.69	29	16	0.17	1	107.12	85.46	3	3.55	3.84	5.08	3.63	-4.82	0.00586	1.51e-05	Moderately soluble	-5.03	0.00362	9.34e-06	Moderately soluble	-7.27	2.08e-05	5.36e-08	Poorly soluble	High	No	No	Yes	Yes	Yes	No	Yes	-6.14	0.55	0	2	2
ZINC217757795	-9.1	0	0	C25H20O5	0	0	0	0	1	400.42	5	0	3.18	30	16	0.2	2	112.99	61.83	3.41	5.35	5.16	5.57	4.53	-5.96	0.000443	1.11e-06	Moderately soluble	-6.4	0.000159	3.97e-07	Poorly soluble	-7.85	5.62e-06	1.4e-08	Poorly soluble	High	Yes	No	No	Yes	Yes	No	Yes	-4.94	0.55	0	2	2
ZINC217768522	-9	0	0	C24H18O7	0	0	0	0	0	418.4	7	0	1.56	31	16	0.21	2	111.53	92.04	3.48	3.74	4.11	5.01	3.58	-5.04	0.00381	9.12e-06	Moderately soluble	-5.37	0.00181	4.31e-06	Moderately soluble	-7.38	1.76e-05	4.22e-08	Poorly soluble	High	No	No	No	Yes	Yes	No	Yes	-6.2	0.55	0	2	2
ZINC217822045	-9	0	0	C25H19NO5	0	0	0	0	0	413.42	5	0	3.11	31	16	0.24	1	114.87	74.6	3.32	3.77	3.87	4.93	3.8	-5.09	0.00333	8.05e-06	Moderately soluble	-5.03	0.00386	9.33e-06	Moderately soluble	-6.97	4.39e-05	1.06e-07	Poorly soluble	High	Yes	No	Yes	Yes	Yes	No	Yes	-6.15	0.55	0	2	2
ZINC217830196	-9	0	0	C22H14O6	0	0	0	0	0	374.34	6	0	1.56	28	20	0.14	1	102.33	86.72	3.03	2.72	3.65	4.93	3.18	-4.34	0.0172	4.6e-05	Moderately soluble	-4.19	0.0239	6.38e-05	Moderately soluble	-7.9	4.7e-06	1.26e-08	Poorly soluble	High	No	No	Yes	No	Yes	No	Yes	-6.65	0.55	0	1	1
[truncated: 1 more columns]
