# Supplementary material for: Comprehensive pan-cancer analysis of p62 reveals its contribution to shaping tumor microenvironment and anti-tumor immunity
Source: Discov Oncol. 2025 Nov 25;16:2296. doi: 10.1007/s12672-025-04135-1 (PMC12748421; doi:10.1007/s12672-025-04135-1)
Supplement: Supplementary file 13 — Additional file13 (XLSX 16 KB) [file 12672_2025_4135_MOESM13_ESM.xlsx]

## Sheet: Sheet1
Zinc ID	Binding Affinity	Name	Distance	Category	Type	From Chemistry	To Chemestry
ZINC08877690	-9.1	N:UNK1:H29 - B:TYR89:O	2.60462	Hydrogen Bond	Carbon Hydrogen Bond	H-Donor	H-Acceptor
		B:ARG96:NH1 - N:UNK1	3.47827	Electrostatic	Pi-Cation	Positive	Pi-Orbitals
		B:ARG96:NH1 - N:UNK1	4.18851	Electrostatic	Pi-Cation	Positive	Pi-Orbitals
		B:ALA17 - N:UNK1	4.1797	Hydrophobic	Alkyl	Alkyl	Alkyl
		B:TYR9 - N:UNK1	4.90505	Hydrophobic	Pi-Alkyl	Pi-Orbitals	Alkyl
		N:UNK1 - B:VAL90	4.63016	Hydrophobic	Pi-Alkyl	Pi-Orbitals	Alkyl
ZINC70669789	-9.3	N:UNK1:N - B:ASP92:OD2	4.81182	Electrostatic	Attractive Charge	Positive	Negative
		B:ALA17 - N:UNK1	4.34	Hydrophobic	Alkyl	Alkyl	Alkyl
		N:UNK1:C - B:VAL90	4.1601	Hydrophobic	Alkyl	Alkyl	Alkyl
		N:UNK1:C - B:LYS91	3.99118	Hydrophobic	Alkyl	Alkyl	Alkyl
		B:TYR9 - N:UNK1	4.91727	Hydrophobic	Pi-Alkyl	Pi-Orbitals	Alkyl
		B:TYR9 - N:UNK1	5.26224	Hydrophobic	Pi-Alkyl	Pi-Orbitals	Alkyl
		B:TYR98 - N:UNK1	5.49156	Hydrophobic	Pi-Alkyl	Pi-Orbitals	Alkyl
ZINC02140075	-9.2	B:LYS91:HN - N:UNK1:F	2.42923	Hydrogen Bond;Halogen	Conventional Hydrogen Bond;Halogen (Fluorine)	H-Donor;Halogen Acceptor	H-Acceptor;Halogen
		B:LYS91:HN - N:UNK1:F	2.12332	Hydrogen Bond;Halogen	Conventional Hydrogen Bond;Halogen (Fluorine)	H-Donor;Halogen Acceptor	H-Acceptor;Halogen
		B:ASP92:HN - N:UNK1:F	2.2239	Hydrogen Bond;Halogen	Conventional Hydrogen Bond;Halogen (Fluorine)	H-Donor;Halogen Acceptor	H-Acceptor;Halogen
		B:ARG96:HE - N:UNK1:F	2.92792	Hydrogen Bond;Halogen	Conventional Hydrogen Bond;Halogen (Fluorine)	H-Donor;Halogen Acceptor	H-Acceptor;Halogen
		B:ARG96:CD - N:UNK1:F	2.90887	Hydrogen Bond	Carbon Hydrogen Bond	H-Donor	H-Acceptor
		B:TYR89:O - N:UNK1:F	3.57055	Halogen	Halogen (Fluorine)	Halogen Acceptor	Halogen
		B:VAL90:C - N:UNK1:F	3.62222	Halogen	Halogen (Fluorine)	Halogen Acceptor	Halogen
		B:ARG68:NH2 - N:UNK1	3.42719	Electrostatic	Pi-Cation	Positive	Pi-Orbitals
		B:ARG68:NH2 - N:UNK1	3.94029	Electrostatic	Pi-Cation	Positive	Pi-Orbitals
		N:UNK1 - B:ALA17	4.7964	Hydrophobic	Pi-Alkyl	Pi-Orbitals	Alkyl
		N:UNK1 - B:ARG68	5.29061	Hydrophobic	Pi-Alkyl	Pi-Orbitals	Alkyl
		N:UNK1 - B:VAL90	5.12004	Hydrophobic	Pi-Alkyl	Pi-Orbitals	Alkyl
ZINC08789284	-9	B:TYR98:HH - N:UNK1:O	2.54174	Hydrogen Bond	Conventional Hydrogen Bond	H-Donor	H-Acceptor
		B:ALA17 - N:UNK1	4.60085	Hydrophobic	Alkyl	Alkyl	Alkyl
		B:ARG68 - N:UNK1	4.6722	Hydrophobic	Alkyl	Alkyl	Alkyl
		B:ARG68 - N:UNK1	5.48084	Hydrophobic	Alkyl	Alkyl	Alkyl
		B:VAL90 - N:UNK1	5.09556	Hydrophobic	Alkyl	Alkyl	Alkyl
ZINC79190247	-9	B:ARG68:HH22 - N:UNK1:O	2.42134	Hydrogen Bond	Conventional Hydrogen Bond	H-Donor	H-Acceptor
		B:ARG68 - N:UNK1	5.42094	Hydrophobic	Alkyl	Alkyl	Alkyl
		N:UNK1 - B:ARG68	5.21105	Hydrophobic	Pi-Alkyl	Pi-Orbitals	Alkyl
		N:UNK1 - B:ARG68	4.20401	Hydrophobic	Pi-Alkyl	Pi-Orbitals	Alkyl
		N:UNK1 - B:ARG96	5.16459	Hydrophobic	Pi-Alkyl	Pi-Orbitals	Alkyl
ZINC85893430	-9.2	N:UNK1:C - B:TYR98:OH	3.77712	Hydrogen Bond	Carbon Hydrogen Bond	H-Donor	H-Acceptor
		N:UNK1:C - B:ALA17:O	3.52682	Hydrogen Bond	Carbon Hydrogen Bond	H-Donor	H-Acceptor
		N:UNK1:C - B:ALA69:O	3.63739	Hydrogen Bond	Carbon Hydrogen Bond	H-Donor	H-Acceptor
		B:ARG68 - N:UNK1	4.62486	Hydrophobic	Alkyl	Alkyl	Alkyl
		N:UNK1 - B:ALA17	4.66342	Hydrophobic	Pi-Alkyl	Pi-Orbitals	Alkyl
		N:UNK1 - B:ILE20	5.03922	Hydrophobic	Pi-Alkyl	Pi-Orbitals	Alkyl
ZINC217598959	-9	B:LYS102:HZ1 - N:UNK1:O	2.24054	Hydrogen Bond	Conventional Hydrogen Bond	H-Donor	H-Acceptor
		B:GLY61:HN - N:UNK1	2.90799	Hydrogen Bond	Pi-Donor Hydrogen Bond	H-Donor	Pi-Orbitals
		B:LEU48:CD1 - N:UNK1	3.51509	Hydrophobic	Pi-Sigma	C-H	Pi-Orbitals
		B:CYS44:SG - N:UNK1	5.20886	Other	Pi-Sulfur	Sulfur	Pi-Orbitals
		B:PHE63 - N:UNK1	5.06698	Hydrophobic	Pi-Pi T-shaped	Pi-Orbitals	Pi-Orbitals
		B:CYS44:C,O;GLU45:N - N:UNK1	4.45276	Hydrophobic	Amide-Pi Stacked	Amide	Pi-Orbitals
		N:UNK1 - B:LEU48	5.30121	Hydrophobic	Pi-Alkyl	Pi-Orbitals	Alkyl
		N:UNK1 - B:LEU48	5.3787	Hydrophobic	Pi-Alkyl	Pi-Orbitals	Alkyl
ZINC217623094	-9	B:LYS102:HZ1 - N:UNK1:O	2.15116	Hydrogen Bond	Conventional Hydrogen Bond	H-Donor	H-Acceptor
		B:GLY61:HN - N:UNK1	2.85001	Hydrogen Bond	Pi-Donor Hydrogen Bond	H-Donor	Pi-Orbitals
		B:LEU48:CD1 - N:UNK1	3.67706	Hydrophobic	Pi-Sigma	C-H	Pi-Orbitals
		B:CYS44:SG - N:UNK1	4.92619	Other	Pi-Sulfur	Sulfur	Pi-Orbitals
		B:PHE63 - N:UNK1	5.19151	Hydrophobic	Pi-Pi T-shaped	Pi-Orbitals	Pi-Orbitals
		B:CYS44:C,O;GLU45:N - N:UNK1	4.66343	Hydrophobic	Amide-Pi Stacked	Amide	Pi-Orbitals
		B:GLY61:C,O;GLY62:N - N:UNK1	5.32082	Hydrophobic	Amide-Pi Stacked	Amide	Pi-Orbitals
ZINC217626420	-9.3	B:LYS102:HZ1 - N:UNK1:O	2.20838	Hydrogen Bond	Conventional Hydrogen Bond	H-Donor	H-Acceptor
		B:GLU45:OE2 - N:UNK1	4.09196	Electrostatic	Pi-Anion	Negative	Pi-Orbitals
		B:GLY61:HN - N:UNK1	2.99123	Hydrogen Bond	Pi-Donor Hydrogen Bond	H-Donor	Pi-Orbitals
		B:LEU48:CD1 - N:UNK1	3.46351	Hydrophobic	Pi-Sigma	C-H	Pi-Orbitals
		B:CYS44:SG - N:UNK1	4.92642	Other	Pi-Sulfur	Sulfur	Pi-Orbitals
		B:CYS44:SG - N:UNK1	5.45439	Other	Pi-Sulfur	Sulfur	Pi-Orbitals
		B:PHE63 - N:UNK1	5.12277	Hydrophobic	Pi-Pi T-shaped	Pi-Orbitals	Pi-Orbitals
		B:CYS44:C,O;GLU45:N - N:UNK1	4.24796	Hydrophobic	Amide-Pi Stacked	Amide	Pi-Orbitals
		N:UNK1 - B:LEU48	5.2164	Hydrophobic	Pi-Alkyl	Pi-Orbitals	Alkyl
		N:UNK1 - B:LEU48	5.34506	Hydrophobic	Pi-Alkyl	Pi-Orbitals	Alkyl
ZINC217664974	-9	B:LYS102:HZ1 - N:UNK1:O	2.1414	Hydrogen Bond	Conventional Hydrogen Bond	H-Donor	H-Acceptor
		N:UNK1:C - B:ASP80:OD2	3.61523	Hydrogen Bond	Carbon Hydrogen Bond	H-Donor	H-Acceptor
		B:GLU45:OE2 - N:UNK1	4.08376	Electrostatic	Pi-Anion	Negative	Pi-Orbitals
		B:GLU45:OE2 - N:UNK1	4.17016	Electrostatic	Pi-Anion	Negative	Pi-Orbitals
		B:GLY61:HN - N:UNK1	2.8155	Hydrogen Bond	Pi-Donor Hydrogen Bond	H-Donor	Pi-Orbitals
		B:LEU48:CD1 - N:UNK1	3.68327	Hydrophobic	Pi-Sigma	C-H	Pi-Orbitals
		B:CYS44:SG - N:UNK1	5.05662	Other	Pi-Sulfur	Sulfur	Pi-Orbitals
		B:PHE63 - N:UNK1	5.15893	Hydrophobic	Pi-Pi T-shaped	Pi-Orbitals	Pi-Orbitals
		B:CYS44:C,O;GLU45:N - N:UNK1	4.73566	Hydrophobic	Amide-Pi Stacked	Amide	Pi-Orbitals
		B:GLY61:C,O;GLY62:N - N:UNK1	5.31848	Hydrophobic	Amide-Pi Stacked	Amide	Pi-Orbitals
ZINC217667805	-9	B:LYS102:HZ1 - N:UNK1:O	2.14379	Hydrogen Bond	Conventional Hydrogen Bond	H-Donor	H-Acceptor
		B:GLY61:HN - N:UNK1	2.80414	Hydrogen Bond	Pi-Donor Hydrogen Bond	H-Donor	Pi-Orbitals
		B:LEU48:CD1 - N:UNK1	3.69176	Hydrophobic	Pi-Sigma	C-H	Pi-Orbitals
		B:CYS44:SG - N:UNK1	4.98891	Other	Pi-Sulfur	Sulfur	Pi-Orbitals
		B:PHE63 - N:UNK1	5.13483	Hydrophobic	Pi-Pi T-shaped	Pi-Orbitals	Pi-Orbitals
		B:CYS44:C,O;GLU45:N - N:UNK1	4.66661	Hydrophobic	Amide-Pi Stacked	Amide	Pi-Orbitals
		B:GLY61:C,O;GLY62:N - N:UNK1	5.27888	Hydrophobic	Amide-Pi Stacked	Amide	Pi-Orbitals
ZINC217757795	-9.1	B:LYS102:HZ1 - N:UNK1:O	2.26315	Hydrogen Bond	Conventional Hydrogen Bond	H-Donor	H-Acceptor
		B:GLU45:OE2 - N:UNK1	4.45042	Electrostatic	Pi-Anion	Negative	Pi-Orbitals
		B:GLU45:OE2 - N:UNK1	3.54489	Electrostatic	Pi-Anion	Negative	Pi-Orbitals
		B:GLY61:HN - N:UNK1	2.96764	Hydrogen Bond	Pi-Donor Hydrogen Bond	H-Donor	Pi-Orbitals
		B:LEU48:CD1 - N:UNK1	3.51045	Hydrophobic	Pi-Sigma	C-H	Pi-Orbitals
		B:CYS44:SG - N:UNK1	5.27897	Other	Pi-Sulfur	Sulfur	Pi-Orbitals
		B:PHE63 - N:UNK1	5.14696	Hydrophobic	Pi-Pi T-shaped	Pi-Orbitals	Pi-Orbitals
		B:CYS44:C,O;GLU45:N - N:UNK1	4.49333	Hydrophobic	Amide-Pi Stacked	Amide	Pi-Orbitals
		N:UNK1:C - B:CYS44	4.07563	Hydrophobic	Alkyl	Alkyl	Alkyl
		N:UNK1 - B:LEU48	5.40738	Hydrophobic	Pi-Alkyl	Pi-Orbitals	Alkyl
		N:UNK1 - B:LEU48	5.45406	Hydrophobic	Pi-Alkyl	Pi-Orbitals	Alkyl
ZINC217768522	-9	B:LYS102:HZ1 - N:UNK1:O	2.21367	Hydrogen Bond	Conventional Hydrogen Bond	H-Donor	H-Acceptor
		B:GLU45:OE2 - N:UNK1	4.11661	Electrostatic	Pi-Anion	Negative	Pi-Orbitals
		B:GLY61:HN - N:UNK1	3.01441	Hydrogen Bond	Pi-Donor Hydrogen Bond	H-Donor	Pi-Orbitals
		B:LEU48:CD1 - N:UNK1	3.44285	Hydrophobic	Pi-Sigma	C-H	Pi-Orbitals
		B:CYS44:SG - N:UNK1	4.91645	Other	Pi-Sulfur	Sulfur	Pi-Orbitals
		B:CYS44:SG - N:UNK1	5.43897	Other	Pi-Sulfur	Sulfur	Pi-Orbitals
		B:PHE63 - N:UNK1	5.13483	Hydrophobic	Pi-Pi T-shaped	Pi-Orbitals	Pi-Orbitals
		B:CYS44:C,O;GLU45:N - N:UNK1	4.24062	Hydrophobic	Amide-Pi Stacked	Amide	Pi-Orbitals
		N:UNK1 - B:LEU48	5.19743	Hydrophobic	Pi-Alkyl	Pi-Orbitals	Alkyl
		N:UNK1 - B:LEU48	5.36501	Hydrophobic	Pi-Alkyl	Pi-Orbitals	Alkyl
ZINC217822045	-9	B:LYS102:HZ1 - N:UNK1:O	2.08552	Hydrogen Bond	Conventional Hydrogen Bond	H-Donor	H-Acceptor
		B:GLU45:OE2 - N:UNK1	4.11837	Electrostatic	Pi-Anion	Negative	Pi-Orbitals
		B:GLU45:OE2 - N:UNK1	4.19609	Electrostatic	Pi-Anion	Negative	Pi-Orbitals
		B:GLY61:HN - N:UNK1	2.95877	Hydrogen Bond	Pi-Donor Hydrogen Bond	H-Donor	Pi-Orbitals
		B:LEU48:CD1 - N:UNK1	3.59448	Hydrophobic	Pi-Sigma	C-H	Pi-Orbitals
		B:CYS44:SG - N:UNK1	5.06726	Other	Pi-Sulfur	Sulfur	Pi-Orbitals
		B:PHE63 - N:UNK1	5.21466	Hydrophobic	Pi-Pi T-shaped	Pi-Orbitals	Pi-Orbitals
		B:CYS44:C,O;GLU45:N - N:UNK1	4.79929	Hydrophobic	Amide-Pi Stacked	Amide	Pi-Orbitals
		B:GLY61:C,O;GLY62:N - N:UNK1	5.3669	Hydrophobic	Amide-Pi Stacked	Amide	Pi-Orbitals
ZINC217830196	-9	B:LYS102:HZ1 - N:UNK1:O	2.16495	Hydrogen Bond	Conventional Hydrogen Bond	H-Donor	H-Acceptor
		B:LYS102:HZ3 - N:UNK1:O	2.54272	Hydrogen Bond	Conventional Hydrogen Bond	H-Donor	H-Acceptor
		B:GLU45:OE2 - N:UNK1	3.915	Electrostatic	Pi-Anion	Negative	Pi-Orbitals
		B:GLY61:HN - N:UNK1	3.14635	Hydrogen Bond	Pi-Donor Hydrogen Bond	H-Donor	Pi-Orbitals
		B:LEU48:CD1 - N:UNK1	3.38591	Hydrophobic	Pi-Sigma	C-H	Pi-Orbitals
		B:CYS44:SG - N:UNK1	4.99597	Other	Pi-Sulfur	Sulfur	Pi-Orbitals
		B:CYS44:SG - N:UNK1	5.64033	Other	Pi-Sulfur	Sulfur	Pi-Orbitals
		B:PHE63 - N:UNK1	5.26092	Hydrophobic	Pi-Pi T-shaped	Pi-Orbitals	Pi-Orbitals
		B:CYS44:C,O;GLU45:N - N:UNK1	4.28087	Hydrophobic	Amide-Pi Stacked	Amide	Pi-Orbitals
		N:UNK1 - B:LEU48	5.443	Hydrophobic	Pi-Alkyl	Pi-Orbitals	Alkyl
